# Supplementary material
Source: publisher site journal article supplement (https://www.spandidos-publications.com/3486/downloadSupplementary)
Supplement: Supplementary file 1 [file downloadSupplementary]

## Sheet: Table SV
Table SV. Gene Ontology analysis of genes of signficantly altered expression
AGS	CCK81	HGC27	SW948	Accession	Ontology	Name
-	-	-	PLK2	GO:0000082	biological_process	G1/S transition of mitotic cell cycle
-	-	-	CAV1, CITED2, EDN1, HDAC5, LMO1, WWTR1	GO:0000122	biological_process	negative regulation of transcription by RNA polymerase II
-	-	EGFR	CAV1	GO:0000165	biological_process	MAPK cascade
-	-	EGFR	-	GO:0000186	biological_process	obsolete activation of MAPKK activity
-	-	-	CAV1	GO:0000188	biological_process	obsolete inactivation of MAPK activity
-	KLF2	-	PTPRO	GO:0000902	biological_process	cell morphogenesis
-	RHOB	-	-	GO:0000910	biological_process	cytokinesis
-	-	-	RGCC	GO:0001100	biological_process	negative regulation of exit from mitosis
-	-	-	CMKLR1, EPHA2	GO:0001501	biological_process	skeletal system development
-	-	-	CTGF	GO:0001502	biological_process	cartilage condensation
-	-	EGFR	CTGF	GO:0001503	biological_process	ossification
-	-	-	SLC1A3	GO:0001504	biological_process	neurotransmitter uptake
-	-	-	KCNMB4	GO:0001508	biological_process	action potential
-	-	-	EDN1	GO:0001516	biological_process	prostaglandin biosynthetic process
-	-	OPN1SW	-	GO:0001523	biological_process	retinoid metabolic process
KDR	RHOB	MEIS1	CAV1, CITED2, EPHA2	GO:0001525	biological_process	angiogenesis
KDR	-	-	-	GO:0001541	biological_process	ovarian follicle development
-	-	IGFBP3	CTGF, CYR61	GO:0001558	biological_process	regulation of cell growth
-	-	COL5A1	-	GO:0001568	biological_process	blood vessel development
-	-	-	EDN1	GO:0001569	biological_process	branching involved in blood vessel morphogenesis
KDR	-	-	ADM, CAV1, EPHA2	GO:0001570	biological_process	vasculogenesis
-	-	-	TAS2R45	GO:0001580	biological_process	detection of chemical stimulus involved in sensory perception of bitter taste
-	-	IGFBP3	CYR61, EPHA2, WWTR1	GO:0001649	biological_process	osteoblast differentiation
-	-	-	IL1RN	GO:0001660	biological_process	fever generation
-	-	-	ACSL6, ACSL6, ADM, CAV1, CITED2, PDGFB	GO:0001666	biological_process	response to hypoxia
-	-	-	ACSL6	GO:0001676	biological_process	long-chain fatty acid metabolic process
-	KLF2	-	EDN1, GJB3, MAFF, PTPRR, PTPRR	GO:0001701	biological_process	in utero embryonic development
-	-	-	SEMA3C	GO:0001755	biological_process	neural crest cell migration
-	-	-	SEMA3C	GO:0001756	biological_process	somitogenesis
-	-	-	EDN1	GO:0001821	biological_process	histamine secretion
-	-	-	ADM	GO:0001843	biological_process	neural tube closure
-	-	EGFR	CITED2	GO:0001889	biological_process	liver development
-	-	-	GJB3	GO:0001890	biological_process	placenta development
-	-	EGFR	PDGFB	GO:0001892	biological_process	embryonic placenta development
-	-	-	CTGF	GO:0001894	biological_process	tissue homeostasis
-	-	IGFBP3	WWTR1	GO:0001933	biological_process	negative regulation of protein phosphorylation
KDR	-	EGFR	CTGF, CYR61	GO:0001934	biological_process	positive regulation of protein phosphorylation
-	-	-	CAV1, RGCC	GO:0001937	biological_process	negative regulation of endothelial cell proliferation
KDR	-	-	PDGFB	GO:0001938	biological_process	positive regulation of endothelial cell proliferation
-	-	EGFR	-	GO:0001942	biological_process	hair follicle development
KDR	-	-	-	GO:0001945	biological_process	lymph vessel development
-	-	-	CAV1, IL1RN, PXDN	GO:0001960	biological_process	negative regulation of cytokine-mediated signaling pathway
-	-	-	SEMA3C	GO:0001974	biological_process	blood vessel remodeling
-	-	-	ADM	GO:0002026	biological_process	regulation of the force of heart contraction
-	-	-	ADM	GO:0002031	biological_process	G protein-coupled receptor internalization
-	-	-	CYR61	GO:0002041	biological_process	intussusceptive angiogenesis
KDR	-	-	-	GO:0002042	biological_process	cell migration involved in sprouting angiogenesis
KDR	-	-	-	GO:0002053	biological_process	positive regulation of mesenchymal cell proliferation
-	-	-	HDAC5	GO:0002076	biological_process	osteoblast development
-	-	-	TNNC1	GO:0002086	biological_process	diaphragm contraction
-	-	MEIS1	-	GO:0002089	biological_process	lens morphogenesis in camera-type eye
-	-	-	IL1RN	GO:0002439	biological_process	chronic inflammatory response to antigenic stimulus
-	-	-	PDGFB, PTPRO	GO:0002548	biological_process	monocyte chemotaxis
-	-	-	PDGFB	GO:0002576	biological_process	platelet degranulation
-	-	-	CXCL1	GO:0002690	biological_process	positive regulation of leukocyte chemotaxis
-	-	-	CAV1	GO:0002931	biological_process	response to ischemia
-	-	COL5A1	-	GO:0003007	biological_process	heart morphogenesis
-	-	-	CAV1	GO:0003057	biological_process	regulation of the force of heart contraction by chemical signal
-	-	-	PTPRO	GO:0003093	biological_process	regulation of glomerular filtration
-	-	-	EDN1	GO:0003100	biological_process	regulation of systemic arterial blood pressure by endothelin
-	-	-	PDGFB	GO:0003104	biological_process	positive regulation of glomerular filtration
-	-	-	PTPRO	GO:0003105	biological_process	negative regulation of glomerular filtration
-	-	-	CITED2, SEMA3C	GO:0003151	biological_process	outflow tract morphogenesis
-	-	-	CITED2	GO:0003156	biological_process	regulation of animal organ formation
KDR	-	-	-	GO:0003158	biological_process	endothelium development
-	-	-	CYR61	GO:0003181	biological_process	atrioventricular valve morphogenesis
-	-	-	CPE	GO:0003214	biological_process	cardiac left ventricle morphogenesis
-	-	-	SEMA3C	GO:0003215	biological_process	cardiac right ventricle morphogenesis
-	-	-	CYR61	GO:0003278	biological_process	apoptotic process involved in heart morphogenesis
-	-	-	CYR61	GO:0003281	biological_process	ventricular septum development
-	-	-	RGCC	GO:0003331	biological_process	positive regulation of extracellular matrix constituent secretion
-	-	-	SLC6A20	GO:0003333	biological_process	amino acid transmembrane transport
-	-	-	SEMA3C	GO:0003350	biological_process	pulmonary myocardium development
-	-	-	KCNMB4	GO:0005513	biological_process	detection of calcium ion
SLC26A1	-	-	SLC2A3	GO:0005975	biological_process	carbohydrate metabolic process
-	-	-	GALNT5	GO:0006024	biological_process	glycosaminoglycan biosynthetic process
-	-	-	ADM	GO:0006171	biological_process	cAMP biosynthetic process
-	-	-	PDGFB	GO:0006260	biological_process	DNA replication
-	-	-	HDAC5	GO:0006325	biological_process	chromatin organization
-	-	-	HDAC5	GO:0006338	biological_process	chromatin remodeling
-	-	-	HDAC5	GO:0006342	biological_process	chromatin silencing
-	KLF2, SP5	CSRNP3	HDAC5, WWTR1	GO:0006351	biological_process	transcription, DNA-templated
-	SP5	-	MAFF, WWTR1	GO:0006355	biological_process	regulation of transcription, DNA-templated
-	FOXQ1	-	ATP2B4	GO:0006357	biological_process	regulation of transcription by RNA polymerase II
-	FOXQ1	MEIS1	MAFF	GO:0006366	biological_process	transcription by RNA polymerase II
-	-	-	CTGF, WWTR1	GO:0006367	biological_process	transcription initiation from RNA polymerase II promoter
-	-	EGFR	-	GO:0006412	biological_process	translation
-	-	-	CPE	GO:0006464	biological_process	cellular protein modification process
STK31	CDK15	CDK19, IGFBP3	CAMKK1, PDGFB, PLK2	GO:0006468	biological_process	protein phosphorylation
-	-	-	WWTR1	GO:0006469	biological_process	negative regulation of protein kinase activity
-	-	-	PTPRO, PTPRR	GO:0006470	biological_process	protein dephosphorylation
-	-	-	GALNT5	GO:0006493	biological_process	protein O-linked glycosylation
-	-	-	CPE, WFDC2	GO:0006508	biological_process	proteolysis
-	-	-	SLC1A3	GO:0006537	biological_process	glutamate biosynthetic process
LGSN	-	-	-	GO:0006542	biological_process	glutamine biosynthetic process
-	-	-	IL1RN	GO:0006629	biological_process	lipid metabolic process
-	-	-	ACSL6	GO:0006637	biological_process	acyl-CoA metabolic process
-	-	-	CAV1, PNLIPRP2	GO:0006641	biological_process	triglyceride metabolic process
-	-	-	ADM	GO:0006701	biological_process	progesterone biosynthetic process
CYP26C1	-	-	SLC2A3	GO:0006766	biological_process	vitamin metabolic process
-	-	-	SLC2A3	GO:0006767	biological_process	water-soluble vitamin metabolic process
CYP26C1, SLC26A1	-	-	-	GO:0006805	biological_process	xenobiotic metabolic process
-	-	SLC4A4	CACNB4	GO:0006810	biological_process	transport
SLC26A1	-	SLC4A4, SLC36A1	SLC1A3, SLC6A20, SLC26A9	GO:0006811	biological_process	ion transport
-	-	-	ANO1	GO:0006812	biological_process	cation transport
-	-	-	KCNK9, KCNMB4	GO:0006813	biological_process	potassium ion transport
-	CYSLTR1	-	CAV1	GO:0006816	biological_process	calcium ion transport
-	-	-	SLC26A9	GO:0006820	biological_process	anion transport
SLC26A1	-	-	ANO1, SLC26A9	GO:0006821	biological_process	chloride transport
-	-	-	SLC6A20	GO:0006836	biological_process	neurotransmitter transport
-	-	SLC36A1	SLC6A20	GO:0006865	biological_process	amino acid transport
-	-	-	GULP1	GO:0006869	biological_process	lipid transport
-	-	-	ATP2B4, CACNB4, CAV1	GO:0006874	biological_process	cellular calcium ion homeostasis
-	-	-	EDN1, SLC26A9	GO:0006885	biological_process	regulation of pH
-	RHOB	-	-	GO:0006886	biological_process	intracellular protein transport
-	-	-	SCARA3	GO:0006898	biological_process	receptor-mediated endocytosis
-	-	-	GULP1	GO:0006911	biological_process	phagocytosis, engulfment
-	RHOB	CSRNP3, IGFBP3	GULP1, PPP1R15A	GO:0006915	biological_process	apoptotic process
-	RHOB	-	-	GO:0006927	biological_process	obsolete transformed cell apoptotic process
-	-	-	PDGFB	GO:0006929	biological_process	substrate-dependent cell migration
-	CYSLTR1	-	CMKLR1, CXCL1, CYR61	GO:0006935	biological_process	chemotaxis
-	-	-	MYL9	GO:0006936	biological_process	muscle contraction
-	-	-	MYL9	GO:0006937	biological_process	regulation of muscle contraction
-	-	-	CAV1	GO:0006940	biological_process	regulation of smooth muscle contraction
-	-	-	SMPX	GO:0006941	biological_process	striated muscle contraction
-	-	EGFR	-	GO:0006950	biological_process	response to stress
-	CYSLTR1	-	-	GO:0006952	biological_process	defense response
-	-	-	IL1RN	GO:0006953	biological_process	acute-phase response
-	CYSLTR1	-	CXCL1, HDAC5	GO:0006954	biological_process	inflammatory response
-	-	-	CMKLR1, CXCL1, IL1RN, PXDN, SEMA3C	GO:0006955	biological_process	immune response
-	-	-	RGCC	GO:0006956	biological_process	complement activation
-	-	EGFR	-	GO:0006970	biological_process	response to osmotic stress
-	-	-	PPP1R15A	GO:0006974	biological_process	cellular response to DNA damage stimulus
-	-	TRIAP1	-	GO:0006977	biological_process	DNA damage response, signal transduction by p53 class mediator resulting in cell cycle arrest
-	-	EGFR	-	GO:0006979	biological_process	response to oxidative stress
-	-	-	ATP8B3	GO:0007030	biological_process	Golgi organization
-	-	-	PPP1R15A	GO:0007050	biological_process	regulation of cell cycle
-	-	-	PLK2	GO:0007052	biological_process	mitotic spindle organization
-	-	-	PLK2	GO:0007093	biological_process	mitotic cell cycle checkpoint signaling
-	-	-	GJB3	GO:0007154	biological_process	cell communication
-	RHOB	COL5A1	CTGF, CYR61, EPHA2, LAMA3	GO:0007155	biological_process	cell adhesion
-	-	-	CTGF	GO:0007160	biological_process	cell-matrix adhesion
-	-	EGFR, OPN1SW	ADM, CXCL1, GULP1, PAG1	GO:0007165	biological_process	signal transduction
-	-	EGFR	EDN1	GO:0007166	biological_process	cell surface receptor signaling pathway
KDR	-	-	-	GO:0007169	biological_process	transmembrane receptor protein tyrosine kinase signaling pathway
-	-	EGFR	PAG1, PDGFB	GO:0007173	biological_process	epidermal growth factor receptor signaling pathway
RHOA	RHOA	RHOA	PDGFB, PPP1R15A, RHOA, WWTR1	GO:0007179	biological_process	transforming growth factor beta receptor signaling pathway
OR4C15	CYSLTR1	OPN1SW	CMKLR1, CXCL1, EDN1, GNGT2, GPR128, GRPR, OR1S2, TAS2R45	GO:0007186	biological_process	G protein-coupled receptor signaling pathway
-	-	-	GPR37L1	GO:0007193	biological_process	adenylate cyclase-inhibiting G protein-coupled receptor signaling pathway
-	-	EGFR	-	GO:0007202	biological_process	activation of phospholipase C activity
-	CYSLTR1	-	ADM, EDN1	GO:0007204	biological_process	positive regulation of cytosolic calcium ion concentration
-	-	-	CERKL, EDN1	GO:0007205	biological_process	protein kinase C-activating G protein-coupled receptor signaling pathway
-	-	-	CACNB4	GO:0007214	biological_process	gamma-aminobutyric acid signaling pathway
-	-	-	CPE	GO:0007218	biological_process	neuropeptide signaling pathway
-	-	-	HDAC5	GO:0007219	biological_process	Notch signaling pathway
-	-	-	CTGF	GO:0007229	biological_process	integrin-mediated signaling pathway
RHOA	RHOA, RHOB	RHOA	ARL14, DOCK4, RHOA	GO:0007264	biological_process	small GTPase mediated signal transduction
-	-	-	PLK2	GO:0007265	biological_process	Ras protein signal transduction
RHOA	RHOA, RHOB	RHOA	RHOA	GO:0007266	biological_process	Rho protein signal transduction
-	-	-	ADM, CTGF, CYR61, EDN1	GO:0007267	biological_process	cell-cell signaling
-	-	-	CACNB4, CAMKK1, GNGT2, KCNK9, KCNMB4, SLC1A3	GO:0007268	biological_process	chemical synaptic transmission
-	-	-	ANO1, EPHA2, SLC2A14	GO:0007275	biological_process	multicellular organism development
-	-	SPIN3	-	GO:0007276	biological_process	gamete generation
-	-	-	SLC2A14, SPANXA1, WFDC2	GO:0007283	biological_process	spermatogenesis
-	-	-	ATP8B3	GO:0007339	biological_process	binding of sperm to zona pellucida
-	-	-	CITED2	GO:0007368	biological_process	determination of left/right symmetry
-	-	-	CXCL1	GO:0007399	biological_process	nervous system development
-	-	-	ACSL6	GO:0007405	biological_process	neuroblast proliferation
RHOA	RHOA, RHOB	COL5A1, EGFR, RHOA	CACNB4, EPHA2, MYL9, PTPRO, RHOA, SEMA3C	GO:0007411	biological_process	axon guidance
CYP26C1, SZT2	-	-	-	GO:0007417	biological_process	central nervous system development
-	-	EGFR	-	GO:0007435	biological_process	salivary gland morphogenesis
-	-	-	ADM, CITED2, EDN1, HDAC5, PDGFB	GO:0007507	biological_process	heart development
-	-	-	TAGLN	GO:0007517	biological_process	muscle organ development
-	-	-	CAV1	GO:0007519	biological_process	skeletal muscle tissue development
-	-	-	CACNB4, DOK7	GO:0007528	biological_process	neuromuscular junction development
-	-	-	CITED2	GO:0007530	biological_process	sex determination
-	-	-	ADM, IL1RN	GO:0007565	biological_process	female pregnancy
-	-	-	MAFF	GO:0007567	biological_process	parturition
-	-	-	ADM	GO:0007568	biological_process	aging
-	-	-	ACSL6	GO:0007584	biological_process	response to nutrient
-	CYSLTR1	-	EDN1	GO:0007585	biological_process	respiratory gaseous exchange by respiratory system
-	-	-	EDN1	GO:0007589	biological_process	body fluid secretion
-	-	-	CAV1	GO:0007595	biological_process	lactation
RHOA	RHOA, RHOB	RHOA	ATP2B4, CAV1, KCNMB4, MAFF, PDGFB, RHOA	GO:0007596	biological_process	blood coagulation
-	-	OPN1SW	CRYGC	GO:0007601	biological_process	visual perception
-	-	OPN1SW	GNGT2	GO:0007602	biological_process	phototransduction
-	-	OPN1SW	-	GO:0007603	biological_process	phototransduction, visible light
-	-	-	GJB3, SLC1A3	GO:0007605	biological_process	sensory perception of sound
-	-	EGFR	-	GO:0007611	biological_process	learning or memory
-	-	-	IL1RN, PLK2	GO:0007613	biological_process	memory
-	-	EGFR	-	GO:0007623	biological_process	circadian rhythm
-	-	-	CACNB4	GO:0007628	biological_process	adult walking behavior
-	-	-	ADM	GO:0008015	biological_process	blood circulation
-	-	-	CAV1	GO:0008104	biological_process	protein localization
KRT28, SMIM24	-	-	CDRT1, KRTAP1-5, NCKAP5, TM4SF1, TM4SF1	GO:0008150	biological_process	biological_process
RHOA	RHOA, RHOB	RHOA	ATP2B4, ATP8B3, CPE, GNGT2, RHOA	GO:0008152	biological_process	metabolic process
-	-	-	ADM	GO:0008209	biological_process	androgen metabolic process
SLC26A1	-	-	-	GO:0008272	biological_process	sulfate transport
-	-	EGFR	CITED2, CXCL1, CYR61, GRPR	GO:0008283	biological_process	cell population proliferation
KDR	-	EGFR	ADM, CTGF, EDN1, PDGFB, WWTR1	GO:0008284	biological_process	positive regulation of cell population proliferation
-	-	IGFBP3	ADM, CXCL1, RGCC	GO:0008285	biological_process	negative regulation of cell population proliferation
-	RHOB	-	-	GO:0008333	biological_process	endosome to lysosome transport
KDR	-	-	-	GO:0008360	biological_process	regulation of cell shape
-	-	EGFR	CTGF, PDGFB	GO:0008543	biological_process	fibroblast growth factor receptor signaling pathway
-	-	-	CTGF, LAMA3, KRT34	GO:0008544	biological_process	epidermis development
-	-	-	EPHA2	GO:0008630	biological_process	intrinsic apoptotic signaling pathway in response to DNA damage
-	-	-	SLC2A3	GO:0008645	biological_process	hexose transmembrane transport
-	-	-	ACSL6	GO:0008654	biological_process	phospholipid biosynthetic process
-	-	-	CAV1	GO:0009267	biological_process	cellular response to starvation
-	-	-	PNLIPRP2	GO:0009395	biological_process	phospholipid catabolic process
SLC26A1	-	-	SLC2A3	GO:0009405	biological_process	obsolete pathogenesis
-	-	-	ADM	GO:0009409	biological_process	response to cold
-	-	-	SLC1A3	GO:0009416	biological_process	response to light stimulus
-	-	-	SLC1A3	GO:0009449	biological_process	gamma-aminobutyric acid biosynthetic process
-	-	-	ADM, CTGF, PDGFB, SLC1A3	GO:0009611	biological_process	response to wounding
-	-	-	ACSL6	GO:0009629	biological_process	response to gravity
-	-	-	SCARA3	GO:0009650	biological_process	UV protection
-	-	-	CYR61	GO:0009653	biological_process	anatomical structure morphogenesis
-	-	-	CTGF	GO:0009749	biological_process	response to glucose
SZT2	-	-	SEMA3C	GO:0009791	biological_process	post-embryonic development
CYP26C1	-	-	-	GO:0009952	biological_process	anterior/posterior pattern specification
-	-	-	EDN1	GO:0009953	biological_process	dorsal/ventral pattern formation
-	-	-	PAG1	GO:0009967	biological_process	positive regulation of signal transduction
-	-	IGFBP3	-	GO:0009968	biological_process	negative regulation of signal transduction
-	-	-	TNNC1	GO:0010038	biological_process	response to metal ion
-	-	-	EDN1	GO:0010193	biological_process	response to ozone
-	-	-	EDN1	GO:0010259	biological_process	multicellular organism aging
-	-	-	CTGF	GO:0010260	biological_process	animal organ senescence
-	-	-	ADM, EDN1	GO:0010460	biological_process	positive regulation of heart rate
-	-	-	CTGF, WWTR1	GO:0010467	biological_process	gene expression
-	-	-	PDGFB	GO:0010512	biological_process	negative regulation of phosphatidylinositol biosynthetic process
-	-	-	CYR61	GO:0010518	biological_process	positive regulation of phospholipase activity
-	-	-	CAV1	GO:0010524	biological_process	positive regulation of calcium ion transport into cytosol
-	-	-	PDGFB	GO:0010544	biological_process	negative regulation of platelet activation
-	-	-	EPHA2	GO:0010591	biological_process	regulation of lamellipodium assembly
KDR	-	-	EDN1	GO:0010595	biological_process	positive regulation of endothelial cell migration
-	-	-	EDN1	GO:0010613	biological_process	positive regulation of cardiac muscle hypertrophy
-	-	-	CITED2, CTGF, PPP1R15A, RGCC, SLC26A9	GO:0010628	biological_process	positive regulation of gene expression
-	-	-	CITED2, CTGF	GO:0010629	biological_process	negative regulation of gene expression
-	-	-	PTPRR	GO:0010633	biological_process	negative regulation of epithelial cell migration
-	-	-	RGCC, WWTR1	GO:0010718	biological_process	positive regulation of epithelial to mesenchymal transition
-	-	-	ACSL6	GO:0010747	biological_process	positive regulation of long-chain fatty acid import across plasma membrane
-	-	-	ATP2B4	GO:0010751	biological_process	negative regulation of nitric oxide mediated signal transduction
-	-	-	CMKLR1	GO:0010759	biological_process	positive regulation of macrophage chemotaxis
-	-	-	CYR61	GO:0010811	biological_process	positive regulation of cell-substrate adhesion
-	-	-	PTPRO	GO:0010812	biological_process	negative regulation of cell-substrate adhesion
-	-	-	HDAC5	GO:0010830	biological_process	regulation of myotube differentiation
-	-	-	HDAC5	GO:0010832	biological_process	negative regulation of myotube differentiation
-	-	-	ACSL6	GO:0010867	biological_process	positive regulation of triglyceride biosynthetic process
-	-	-	EDN1	GO:0010870	biological_process	obsolete positive regulation of receptor biosynthetic process
-	-	IGFBP3	-	GO:0010906	biological_process	regulation of glucose metabolic process
-	-	CSRNP3	-	GO:0010923	biological_process	negative regulation of phosphatase activity
-	-	-	WFDC2	GO:0010951	biological_process	negative regulation of endopeptidase activity
-	-	-	CAV1	GO:0010952	biological_process	positive regulation of peptidase activity
-	-	EGFR	-	GO:0010960	biological_process	magnesium ion homeostasis
-	-	-	ACSL6	GO:0010976	biological_process	positive regulation of neuron projection development
-	-	-	PTPRO	GO:0010977	biological_process	negative regulation of neuron projection development
-	-	-	EPHA2	GO:0014028	biological_process	notochord formation
CYP26C1	-	-	EDN1	GO:0014032	biological_process	neural crest cell development
-	-	-	IL1RN	GO:0014050	biological_process	negative regulation of glutamate secretion
-	-	-	CACNB4	GO:0014051	biological_process	gamma-aminobutyric acid secretion
-	-	-	EDN1	GO:0014065	biological_process	phosphatidylinositol 3-kinase signaling
KDR	-	-	PDGFB	GO:0014068	biological_process	positive regulation of phosphatidylinositol 3-kinase signaling
-	-	-	EDN1, IL1RN	GO:0014823	biological_process	response to activity
-	-	-	EDN1	GO:0014824	biological_process	artery smooth muscle contraction
-	-	-	EDN1	GO:0014826	biological_process	vein smooth muscle contraction
-	-	-	PDGFB	GO:0014911	biological_process	positive regulation of smooth muscle cell migration
-	-	-	IGFBP3	GO:0014912	biological_process	negative regulation of smooth muscle cell migration
-	ZG16	-	SNX22	GO:0015031	biological_process	protein transport
-	-	SLC4A4	SLC26A9	GO:0015701	biological_process	bicarbonate transport
-	-	-	EDN1, SLC2A3, SLC2A14	GO:0015758	biological_process	glucose transmembrane transport
-	-	SLC36A1	-	GO:0015808	biological_process	L-alanine transport
-	-	SLC36A1	SLC6A20	GO:0015816	biological_process	glycine transport
-	-	-	SLC6A20	GO:0015824	biological_process	proline transport
-	-	-	ACSL6	GO:0015908	biological_process	fatty acid transport
-	-	TRIAP1	-	GO:0015914	biological_process	phospholipid transport
KDR, RHOA	RHOA	RHOA	RHOA	GO:0016032	biological_process	viral process
-	-	-	EDN1, PDGFB	GO:0016049	biological_process	cell growth
-	-	-	CAV1	GO:0016050	biological_process	vesicle organization
-	-	-	AMOTL2	GO:0016055	biological_process	Wnt signaling pathway
-	-	EGFR	-	GO:0016101	biological_process	diterpenoid metabolic process
-	-	-	GALNT5	GO:0016266	biological_process	O-glycan processing
-	-	-	CERKL	GO:0016310	biological_process	phosphorylation
-	-	-	NT5DC4	GO:0016311	biological_process	dephosphorylation
-	-	EGFR	-	GO:0016337	biological_process	cell-cell adhesion
CLDN18	-	-	-	GO:0016338	biological_process	calcium-independent cell-cell adhesion via plasma membrane cell-adhesion molecules
-	-	COL5A1	CTGF, EPHA2	GO:0016477	biological_process	cell migration
-	-	-	RGCC	GO:0016525	biological_process	negative regulation of angiogenesis
-	-	-	SH3RF1, WWTR1	GO:0016567	biological_process	protein ubiquitination
-	-	-	HDAC5	GO:0016568	biological_process	chromatin organization
-	-	-	HDAC5	GO:0016575	biological_process	histone deacetylation
-	-	-	WWTR1	GO:0017145	biological_process	stem cell division
-	-	-	PDGFB	GO:0018105	biological_process	peptidyl-serine phosphorylation
KDR	-	EGFR	EPHA2, PDGFB	GO:0018108	biological_process	peptidyl-tyrosine phosphorylation
-	-	OPN1SW	-	GO:0018298	biological_process	protein-chromophore linkage
-	-	ZDHHC20	-	GO:0018345	biological_process	protein palmitoylation
-	-	-	CAV1	GO:0019217	biological_process	regulation of fatty acid metabolic process
-	-	-	CACNB4	GO:0019227	biological_process	neuronal action potential propagation
-	-	-	KCNMB4	GO:0019228	biological_process	neuronal action potential
-	-	-	EDN1, KCNMB4	GO:0019229	biological_process	regulation of vasoconstriction
-	-	-	EDN1, IL1RN	GO:0019233	biological_process	sensory perception of pain
-	-	-	PNLIPRP2	GO:0019376	biological_process	galactolipid catabolic process
-	-	-	ACSL6	GO:0019432	biological_process	triglyceride biosynthetic process
SLC26A1	-	-	-	GO:0019532	biological_process	oxalate transport
-	-	EGFR	-	GO:0019694	biological_process	alkanesulfonate metabolic process
-	-	-	EDN1	GO:0019722	biological_process	calcium-mediated signaling
-	-	-	IL1RN	GO:0019752	biological_process	carboxylic acid metabolic process
-	-	-	SLC2A3	GO:0019852	biological_process	L-ascorbic acid metabolic process
-	-	-	CAV1	GO:0019915	biological_process	lipid storage
-	-	-	ADM	GO:0019933	biological_process	cAMP-mediated signaling
SZT2	-	-	-	GO:0021540	biological_process	corpus callosum morphogenesis
-	-	-	SLC1A3	GO:0021545	biological_process	cranial nerve development
RHOA	RHOA	RHOA	RHOA	GO:0021762	biological_process	substantia nigra development
-	-	EGFR	-	GO:0021795	biological_process	cerebral cortex cell migration
-	-	-	EPHA2, SEMA3C	GO:0021915	biological_process	neural tube development
-	-	-	GPR37L1	GO:0021940	biological_process	positive regulation of cerebellar granule cell precursor proliferation
-	-	-	CITED2	GO:0022409	biological_process	positive regulation of cell-cell adhesion
-	-	COL5A1	LAMA3	GO:0022617	biological_process	extracellular matrix disassembly
KDR	-	-	-	GO:0023014	biological_process	signal transduction
-	-	-	PDGFB	GO:0030031	biological_process	cell projection assembly
-	-	-	PTPRO	GO:0030032	biological_process	lamellipodium assembly
RHOA	RHOA	RHOA	CXCL1, PDGFB, RHOA	GO:0030036	biological_process	actin cytoskeleton organization
-	-	-	TNNC1	GO:0030049	biological_process	muscle filament sliding
-	-	-	CPE	GO:0030070	biological_process	insulin processing
-	-	-	EDN1	GO:0030072	biological_process	peptide hormone secretion
-	-	-	IL1RN	GO:0030073	biological_process	insulin secretion
-	-	-	PDGFB	GO:0030097	biological_process	hemopoiesis
-	-	-	SPTSSB	GO:0030148	biological_process	sphingolipid biosynthetic process
-	-	-	CITED2, CTGF, SLC2A14	GO:0030154	biological_process	cell differentiation
-	-	-	LAMA3	GO:0030155	biological_process	regulation of cell adhesion
RHOA	RHOA, RHOB	RHOA	PDGFB, RHOA	GO:0030168	biological_process	platelet activation
-	-	-	HDAC5	GO:0030183	biological_process	B cell differentiation
-	-	-	EDN1	GO:0030185	biological_process	nitric oxide transport
-	-	-	CAV1	GO:0030193	biological_process	regulation of blood coagulation
-	-	-	EDN1	GO:0030195	biological_process	negative regulation of blood coagulation
KDR	-	COL5A1	CYR61, LAMA3, PDGFB, PXDN	GO:0030198	biological_process	extracellular matrix organization
-	-	COL5A1	-	GO:0030199	biological_process	collagen fibril organization
SLC26A1	-	-	-	GO:0030203	biological_process	glycosaminoglycan metabolic process
-	-	-	EPHA2	GO:0030216	biological_process	keratinocyte differentiation
-	-	-	CAV1	GO:0030301	biological_process	cholesterol transport
-	-	-	EPHA2	GO:0030316	biological_process	osteoclast differentiation
-	-	EGFR	CTGF	GO:0030324	biological_process	lung development
-	-	TRIAP1	-	GO:0030330	biological_process	DNA damage response, signal transduction by p53 class mediator
RHOA	RHOA	RHOA	LAMA3, RHOA	GO:0030334	biological_process	regulation of cell migration
KDR	-	EGFR	CYR61, EDN1, PDGFB	GO:0030335	biological_process	positive regulation of cell migration
-	-	-	CITED2, IL1RN, PDGFB	GO:0030336	biological_process	negative regulation of cell migration
-	-	-	CITED2	GO:0030511	biological_process	positive regulation of transforming growth factor beta receptor signaling pathway
-	-	-	PPP1R15A	GO:0030512	biological_process	negative regulation of transforming growth factor beta receptor signaling pathway
-	-	-	CYR61	GO:0030513	biological_process	positive regulation of BMP signaling pathway
-	-	-	CAV1	GO:0030514	biological_process	negative regulation of BMP signaling pathway
-	-	COL5A1	-	GO:0030574	biological_process	collagen catabolic process
-	-	-	EDN1	GO:0030593	biological_process	neutrophil chemotaxis
-	-	-	EDN1	GO:0030818	biological_process	obsolete negative regulation of cAMP biosynthetic process
-	-	-	ADM	GO:0030819	biological_process	obsolete positive regulation of cAMP biosynthetic process
-	-	-	TAGLN	GO:0030855	biological_process	epithelial cell differentiation
-	-	-	CAV1	GO:0030857	biological_process	negative regulation of epithelial cell differentiation
-	-	-	CAV1	GO:0030879	biological_process	mammary gland development
-	-	-	PPP1R15A	GO:0030968	biological_process	endoplasmic reticulum unfolded protein response
-	-	-	LIMCH1	GO:0031032	biological_process	actomyosin structure organization
-	FOXQ1	-	-	GO:0031069	biological_process	hair follicle morphogenesis
-	-	-	ADM	GO:0031100	biological_process	animal organ regeneration
-	-	-	ADM	GO:0031102	biological_process	neuron projection regeneration
-	-	-	WWTR1	GO:0031146	biological_process	SCF-dependent proteasomal ubiquitin-dependent protein catabolic process
-	-	-	SLC1A3	GO:0031223	biological_process	auditory behavior
-	-	-	CAV1	GO:0031295	biological_process	T cell costimulation
-	-	-	CAV1	GO:0031397	biological_process	negative regulation of protein ubiquitination
-	-	-	LAMA3	GO:0031581	biological_process	hemidesmosome assembly
-	-	-	EDN1	GO:0031583	biological_process	phospholipase D-activating G protein-coupled receptor signaling pathway
-	-	-	ADM	GO:0031623	biological_process	receptor internalization
-	-	EGFR	RGCC	GO:0031659	biological_process	obsolete positive regulation of cyclin-dependent protein serine/threonine kinase activity involved in G1/S transition of mitotic cell cycle
-	-	-	PDGFB	GO:0031954	biological_process	positive regulation of protein autophosphorylation
-	-	-	GRPR	GO:0031989	biological_process	bombesin receptor signaling pathway
-	-	-	PPP1R15A	GO:0032058	biological_process	positive regulation of translational initiation in response to stress
-	-	-	CMKLR1	GO:0032088	biological_process	negative regulation of NF-kappaB transcription factor activity
-	-	-	CAV1	GO:0032091	biological_process	negative regulation of protein binding
-	-	-	PLK2	GO:0032092	biological_process	positive regulation of protein binding
-	-	-	PDGFB	GO:0032147	biological_process	activation of protein kinase activity
-	-	-	PDGFB	GO:0032148	biological_process	activation of protein kinase B activity
-	METTL6	-	-	GO:0032259	biological_process	methylation
-	-	-	EDN1	GO:0032269	biological_process	negative regulation of cellular protein metabolic process
-	-	-	EDN1	GO:0032308	biological_process	positive regulation of prostaglandin secretion
-	-	-	CTGF	GO:0032330	biological_process	regulation of chondrocyte differentiation
-	-	-	CTGF, PDGFB	GO:0032355	biological_process	response to estradiol
-	-	-	PLK2	GO:0032436	biological_process	positive regulation of proteasomal ubiquitin-dependent protein catabolic process
RHOA	RHOA	RHOA	RHOA	GO:0032467	biological_process	positive regulation of cytokinesis
-	-	-	PLK2	GO:0032486	biological_process	Rap protein signal transduction
-	-	-	ADM, CXCL1, EDN1, IL1RN	GO:0032496	biological_process	response to lipopolysaccharide
-	-	-	CAV1	GO:0032507	biological_process	maintenance of protein location in cell
-	-	-	PPP1R15A	GO:0032515	biological_process	negative regulation of phosphoprotein phosphatase activity
-	-	-	PPP1R15A	GO:0032516	biological_process	positive regulation of phosphoprotein phosphatase activity
-	-	-	CAV1	GO:0032570	biological_process	response to progesterone
-	-	-	CMKLR1	GO:0032695	biological_process	negative regulation of interleukin-12 production
-	KLF2	-	-	GO:0032715	biological_process	negative regulation of interleukin-6 production
-	-	-	PTPRO, WWTR1	GO:0032835	biological_process	glomerulus development
-	-	-	DOCK4	GO:0032855	biological_process	biological_process
-	-	-	EPHA2	GO:0032863	biological_process	activation of GTPase activity
-	-	-	ADM, PDGFB	GO:0032868	biological_process	response to insulin
-	-	-	ACSL6, HDAC5	GO:0032869	biological_process	cellular response to insulin stimulus
-	-	EGFR	-	GO:0032930	biological_process	positive regulation of superoxide anion generation
-	-	COL5A1	-	GO:0032964	biological_process	collagen biosynthetic process
-	-	-	CTGF, RGCC	GO:0032967	biological_process	positive regulation of collagen biosynthetic process
-	-	-	TNNC1	GO:0032972	biological_process	regulation of muscle filament sliding speed
-	-	-	CAV1	GO:0033137	biological_process	negative regulation of peptidyl-serine phosphorylation
-	-	-	ATP2B4, CAV1, PPP1R15A	GO:0033138	biological_process	positive regulation of peptidyl-serine phosphorylation
-	-	-	CAV1	GO:0033484	biological_process	nitric oxide homeostasis
-	-	-	HDAC5	GO:0033555	biological_process	multicellular organismal response to stress
-	-	-	EDN1	GO:0033574	biological_process	response to testosterone
-	-	EGFR	-	GO:0033590	biological_process	response to cobalamin
-	-	EGFR	-	GO:0033594	biological_process	response to hydroxyisoflavone
-	-	-	EPHA2	GO:0033598	biological_process	mammary gland epithelial cell proliferation
-	-	-	EPHA2	GO:0033628	biological_process	regulation of cell adhesion mediated by integrin
RHOA	RHOA	RHOA	RHOA	GO:0033688	biological_process	regulation of osteoblast proliferation
-	-	-	CYR61	GO:0033690	biological_process	positive regulation of osteoblast proliferation
-	-	-	CTGF	GO:0034059	biological_process	response to anoxia
-	-	-	IL1RN	GO:0034115	biological_process	negative regulation of heterotypic cell-cell adhesion
-	-	-	ANO1, ATP2B4	GO:0034220	biological_process	ion transmembrane transport
CLDN18	-	-	-	GO:0034329	biological_process	cell junction assembly
-	-	-	EDN1	GO:0034392	biological_process	negative regulation of smooth muscle cell apoptotic process
-	-	-	CITED2	GO:0034405	biological_process	response to fluid shear stress
-	-	TRIAP1	-	GO:0034644	biological_process	cellular response to UV
CYP26C1	-	-	-	GO:0034653	biological_process	retinoic acid catabolic process
-	-	-	EDN1	GO:0034696	biological_process	response to prostaglandin F
-	-	-	KCNK9	GO:0034765	biological_process	regulation of ion transmembrane transport
-	-	-	EDN1	GO:0035094	biological_process	response to nicotine
KDR	-	-	-	GO:0035162	biological_process	embryonic hemopoiesis
-	-	-	CACNB4	GO:0035249	biological_process	synaptic transmission, glutamatergic
-	KLF2	-	-	GO:0035264	biological_process	multicellular organism growth
-	-	-	PPP1R15A	GO:0035308	biological_process	negative regulation of protein dephosphorylation
-	-	COL5A1	-	GO:0035313	biological_process	wound healing, spreading of epidermal cells
-	-	-	AMOTL2, WWTR1	GO:0035329	biological_process	hippo signaling
-	-	-	PTPN20B, PTPRO, PTPRR	GO:0035335	biological_process	peptidyl-tyrosine dephosphorylation
-	-	-	ACSL6	GO:0035338	biological_process	long-chain fatty-acyl-CoA biosynthetic process
-	-	-	CITED2	GO:0035360	biological_process	positive regulation of peroxisome proliferator activated receptor signaling pathway
-	-	EGFR	-	GO:0035413	biological_process	positive regulation of canonical Wnt signaling pathway
-	-	-	WWTR1	GO:0035414	biological_process	negative regulation of canonical Wnt signaling pathway
-	-	SLC36A1	-	GO:0035524	biological_process	proline transmembrane transport
-	-	-	CTGF, CXCL1, PAG1	GO:0035556	biological_process	intracellular signal transduction
KDR	-	-	-	GO:0035584	biological_process	calcium-mediated signaling using intracellular calcium source
-	-	EGFR	EDN1	GO:0035690	biological_process	cellular response to drug
-	-	SLC4A4	-	GO:0035725	biological_process	sodium ion transmembrane transport
-	-	-	PDGFB	GO:0035793	biological_process	positive regulation of metanephric mesenchymal cell migration by platelet-derived growth factor receptor-beta signaling pathway
-	-	-	CITED2	GO:0035802	biological_process	adrenal cortex formation
-	-	-	EDN1	GO:0035810	biological_process	positive regulation of urine volume
-	-	-	EDN1	GO:0035815	biological_process	positive regulation of renal sodium excretion
-	-	MEIS1	-	GO:0035855	biological_process	megakaryocyte development
-	-	-	MAFF	GO:0035914	biological_process	skeletal muscle cell differentiation
KDR	-	-	-	GO:0035924	biological_process	cellular response to vascular endothelial growth factor stimulus
-	-	-	LAMA3	GO:0035987	biological_process	endodermal cell differentiation
-	-	-	CTGF	GO:0035988	biological_process	chondrocyte proliferation
-	-	COL5A1	-	GO:0035989	biological_process	tendon development
-	-	-	EDN1	GO:0035994	biological_process	response to muscle stretch
-	KLF2	-	-	GO:0036003	biological_process	positive regulation of transcription from RNA polymerase II promoter in response to stress
-	-	-	PTPRO	GO:0036060	biological_process	slit diaphragm assembly
RHOA	RHOA	RHOA	RHOA	GO:0036089	biological_process	cleavage furrow formation
-	-	-	PDGFB	GO:0038001	biological_process	paracrine signaling
RHOA	RHOA	RHOA	RHOA	GO:0038027	biological_process	apolipoprotein A-I-mediated signaling pathway
KDR	-	-	-	GO:0038083	biological_process	peptidyl-tyrosine autophosphorylation
KDR	-	-	-	GO:0038084	biological_process	vascular endothelial growth factor signaling pathway
-	-	EGFR	PDGFB	GO:0038095	biological_process	Fc-epsilon receptor signaling pathway
-	-	-	PTPRR	GO:0038128	biological_process	ERBB2 signaling pathway
-	KLF2	-	HDAC5	GO:0040029	biological_process	regulation of gene expression, epigenetic
-	-	-	EDN1	GO:0042045	biological_process	epithelial fluid transport
-	-	EGFR	-	GO:0042059	biological_process	negative regulation of epidermal growth factor receptor signaling pathway
-	-	-	HDAC5	GO:0042113	biological_process	B cell activation
-	-	-	GRPR	GO:0042127	biological_process	regulation of cell population proliferation
-	-	EGFR	-	GO:0042177	biological_process	negative regulation of protein catabolic process
-	-	-	HDAC5	GO:0042220	biological_process	response to cocaine
-	-	-	CAV1, EDN1	GO:0042310	biological_process	vasoconstriction
-	-	-	EDN1	GO:0042313	biological_process	protein kinase C deactivation
-	-	EGFR	-	GO:0042327	biological_process	positive regulation of phosphorylation
RHOA	RHOA	RHOA	RHOA	GO:0042346	biological_process	positive regulation of NIK/NF-kappaB signaling
-	-	-	ANO1	GO:0042391	biological_process	regulation of membrane potential
-	-	-	EDN1	GO:0042474	biological_process	middle ear morphogenesis
-	-	-	ADM	GO:0042475	biological_process	odontogenesis of dentin-containing tooth
-	-	-	EDN1	GO:0042482	biological_process	positive regulation of odontogenesis
-	-	-	HDAC5, IL1RN, PDGFB, SEMA3C, SLC1A3	GO:0042493	biological_process	response to drug
-	-	-	CAV1	GO:0042524	biological_process	negative regulation of tyrosine phosphorylation of STAT protein
-	-	-	EDN1	GO:0042554	biological_process	superoxide anion generation
-	-	-	ADM, IL1RN	GO:0042594	biological_process	response to starvation
-	-	-	CAV1	GO:0042632	biological_process	cholesterol homeostasis
-	-	EGFR	-	GO:0042698	biological_process	ovulation cycle
-	-	EGFR	-	GO:0042743	biological_process	hydrogen peroxide metabolic process
-	-	-	PXDN	GO:0042744	biological_process	hydrogen peroxide catabolic process
-	-	EGFR	-	GO:0043006	biological_process	activation of phospholipase A2 activity by calcium-mediated signaling
-	-	-	CRYGC	GO:0043010	biological_process	camera-type eye development
-	RHOB	CSRNP3, IGFBP3	ADM	GO:0043065	biological_process	positive regulation of apoptotic process
KDR	-	TRIAP1	CERKL, CITED2, CYR61, IL1RN, LIMS2, PLK2, SH3RF1	GO:0043066	biological_process	negative regulation of apoptotic process
-	-	IGFBP3	CXCL1	GO:0043085	biological_process	positive regulation of catalytic activity
-	-	-	DOK7	GO:0043113	biological_process	receptor clustering
-	-	-	ADM	GO:0043116	biological_process	negative regulation of vascular permeability
-	-	-	PLK2, RHOA	GO:0043123	biological_process	positive regulation of I-kappaB kinase/NF-kappaB signaling
KDR	-	-	-	GO:0043129	biological_process	surfactant homeostasis
-	-	TRIAP1	SH3RF1	GO:0043154	biological_process	negative regulation of cysteine-type endopeptidase activity involved in apoptotic process
-	-	-	EDN1	GO:0043179	biological_process	rhythmic excitation
-	-	-	CTGF, EDN1	GO:0043200	biological_process	response to amino acid
-	-	COL5A1	-	GO:0043206	biological_process	supramolecular fiber organization
-	KLF2	-	-	GO:0043249	biological_process	erythrocyte maturation
-	-	-	CTGF, CYR61	GO:0043280	biological_process	positive regulation of cysteine-type endopeptidase activity involved in apoptotic process
RHOA	RHOA	RHOA	RHOA	GO:0043297	biological_process	apical junction assembly
-	-	-	HDAC5	GO:0043393	biological_process	regulation of protein binding
-	-	-	EDN1, PDGFB	GO:0043406	biological_process	positive regulation of MAP kinase activity
-	-	-	CAV1	GO:0043409	biological_process	negative regulation of MAPK cascade
KDR	-	IGFBP3	GPR37L1, PDGFB	GO:0043410	biological_process	positive regulation of MAPK cascade
-	-	-	CTGF	GO:0043434	biological_process	response to peptide hormone
-	-	-	TNNC1	GO:0043462	biological_process	regulation of ATPase activity
SZT2	-	-	-	GO:0043473	biological_process	pigmentation
-	-	-	EPHA2	GO:0043491	biological_process	protein kinase B signaling
-	-	-	EDN1, IL1RN	GO:0043507	biological_process	positive regulation of JUN kinase activity
-	-	-	EPHA2	GO:0043535	biological_process	regulation of blood vessel endothelial cell migration
-	-	-	PDGFB	GO:0043536	biological_process	positive regulation of blood vessel endothelial cell migration
-	-	-	RGCC	GO:0043537	biological_process	negative regulation of blood vessel endothelial cell migration
-	-	-	S100A2	GO:0043542	biological_process	endothelial cell migration
-	-	-	PDGFB	GO:0043552	biological_process	positive regulation of phosphatidylinositol 3-kinase activity
-	-	IGFBP3	-	GO:0043567	biological_process	regulation of insulin-like growth factor receptor signaling pathway
-	-	IGFBP3	-	GO:0043568	biological_process	positive regulation of insulin-like growth factor receptor signaling pathway
-	-	COL5A1	GJB3	GO:0043588	biological_process	skin development
-	-	-	CAV1, CITED2	GO:0043627	biological_process	response to estrogen
-	-	-	GALNT5	GO:0043687	biological_process	post-translational protein modification
RHOA	RHOA	RHOA	RHOA	GO:0043931	biological_process	ossification involved in bone maturation
-	-	-	PNLIPRP2	GO:0044241	biological_process	lipid digestion
-	-	-	ACSL6	GO:0044255	biological_process	cellular lipid metabolic process
-	-	IGFBP3	CPE, GALNT5	GO:0044267	biological_process	cellular protein metabolic process
CYP26C1, SLC26A1	-	-	ACSL6, CAV1, CTGF, PNLIPRP2, SLC2A3	GO:0044281	biological_process	small molecule metabolic process
RHOA	RHOA	RHOA	CYR61, RHOA	GO:0044319	biological_process	wound healing, spreading of cells
-	-	-	EDN1	GO:0044321	biological_process	response to leptin
-	-	IGFBP3	-	GO:0044342	biological_process	type B pancreatic cell proliferation
-	-	-	ATP2B4, CAV1	GO:0045019	biological_process	negative regulation of nitric oxide biosynthetic process
-	-	-	PDGFB	GO:0045087	biological_process	innate immune response
-	-	COL5A1	-	GO:0045112	biological_process	integrin biosynthetic process
KDR	-	-	-	GO:0045165	biological_process	cell fate commitment
-	-	SWAP70	-	GO:0045190	biological_process	isotype switching
CLDN18	-	-	-	GO:0045216	biological_process	cell-cell junction organization
-	-	-	ATP8B3	GO:0045332	biological_process	phospholipid translocation
KDR	-	-	-	GO:0045446	biological_process	endothelial cell differentiation
-	-	-	AIFM3	GO:0045454	biological_process	cell redox homeostasis
-	-	-	CTGF	GO:0045597	biological_process	positive regulation of cell differentiation
-	-	-	WWTR1	GO:0045599	biological_process	negative regulation of fat cell differentiation
-	-	-	CMKLR1	GO:0045600	biological_process	positive regulation of fat cell differentiation
-	-	-	MAFF	GO:0045604	biological_process	regulation of epidermal cell differentiation
-	-	MEIS1	-	GO:0045638	biological_process	negative regulation of myeloid cell differentiation
-	-	IGFBP3	-	GO:0045663	biological_process	positive regulation of myoblast differentiation
-	-	MEIS1	GPR37L1	GO:0045665	biological_process	negative regulation of neuron differentiation
RHOA	RHOA	RHOA	RHOA	GO:0045666	biological_process	positive regulation of neuron differentiation
-	-	-	HDAC5	GO:0045668	biological_process	negative regulation of osteoblast differentiation
-	-	-	CYR61	GO:0045669	biological_process	positive regulation of osteoblast differentiation
-	-	-	PDGFB	GO:0045737	biological_process	positive regulation of cyclin-dependent protein serine/threonine kinase activity
-	-	-	PDGFB	GO:0045740	biological_process	positive regulation of DNA replication
-	-	-	PDGFB	GO:0045743	biological_process	positive regulation of fibroblast growth factor receptor signaling pathway
-	-	-	EPHA2	GO:0045765	biological_process	regulation of angiogenesis
KDR	CYSLTR1, RHOB	-	ADM	GO:0045766	biological_process	positive regulation of angiogenesis
-	RHOB	-	-	GO:0045786	biological_process	negative regulation of cell cycle
-	-	-	CITED2	GO:0045787	biological_process	positive regulation of cell cycle
-	-	-	IL1RN	GO:0045837	biological_process	negative regulation of membrane potential
-	-	-	PDGFB, RGCC	GO:0045840	biological_process	positive regulation of mitotic nuclear division
-	-	-	CYR61	GO:0045860	biological_process	positive regulation of protein kinase activity
-	-	-	GPR37L1	GO:0045879	biological_process	negative regulation of smoothened signaling pathway
-	-	-	CITED2, HDAC5, PDGFB	GO:0045892	biological_process	negative regulation of transcription, DNA-templated
-	-	-	CITED2	GO:0045893	biological_process	positive regulation of transcription, DNA-templated
-	-	-	ADM	GO:0045906	biological_process	negative regulation of vasoconstriction
-	CYSLTR1	-	-	GO:0045907	biological_process	positive regulation of vasoconstriction
-	-	-	ADM	GO:0045909	biological_process	vasodilation
-	-	-	PPP1R15A	GO:0045943	biological_process	positive regulation of transcription by RNA polymerase I
-	KLF2	CSRNP3, MEIS1, TRIAP1	CITED2, CYR61, HDAC5, LMO1, RGCC, WWTR1	GO:0045944	biological_process	positive regulation of transcription by RNA polymerase II
-	-	-	LAMA3	GO:0045995	biological_process	regulation of embryonic development
-	-	-	CACNB4	GO:0046058	biological_process	cAMP metabolic process
-	-	-	CAV1	GO:0046209	biological_process	nitric oxide metabolic process
-	-	-	SH3RF1	GO:0046328	biological_process	regulation of JNK cascade
-	-	-	CTGF	GO:0046330	biological_process	positive regulation of JNK cascade
-	-	-	PLK2	GO:0046599	biological_process	regulation of centriole replication
-	-	-	SLC1A3	GO:0046677	biological_process	response to antibiotic
KDR	-	-	-	GO:0046777	biological_process	protein autophosphorylation
-	-	-	EPHA2	GO:0046849	biological_process	bone remodeling
-	-	-	ADM	GO:0046879	biological_process	hormone secretion
-	-	-	KCNMB4	GO:0046928	biological_process	regulation of neurotransmitter secretion
KDR, RHOA	RHOA	RHOA	RHOA	GO:0048010	biological_process	vascular endothelial growth factor receptor signaling pathway
RHOA	RHOA	RHOA	RHOA	GO:0048011	biological_process	neurotrophin TRK receptor signaling pathway
RHOA	RHOA	RHOA	RHOA	GO:0048013	biological_process	ephrin receptor signaling pathway
RHOA	RHOA	RHOA	RHOA	GO:0048015	biological_process	phosphatidylinositol-mediated signaling
-	-	-	PLK2	GO:0048167	biological_process	regulation of synaptic plasticity
CYP26C1	-	-	-	GO:0048284	biological_process	organelle fusion
KDR	-	-	-	GO:0048286	biological_process	lung alveolus development
-	-	-	EPHA2	GO:0048320	biological_process	axial mesoderm formation
CYP26C1	-	-	-	GO:0048387	biological_process	negative regulation of retinoic acid receptor signaling pathway
KDR	-	-	-	GO:0048469	biological_process	cell maturation
-	-	-	CACNB4, CITED2	GO:0048536	biological_process	spleen development
-	-	-	CACNB4	GO:0048538	biological_process	thymus development
-	-	-	CACNB4	GO:0048541	biological_process	Peyer's patch development
-	-	-	ACSL6	GO:0048545	biological_process	response to steroid hormone
-	-	-	ADM	GO:0048589	biological_process	developmental growth
-	-	COL5A1	-	GO:0048592	biological_process	eye morphogenesis
-	-	IGFBP3	-	GO:0048662	biological_process	negative regulation of smooth muscle cell proliferation
-	-	-	ACSL6	GO:0048666	biological_process	neuron development
-	-	-	SLC1A3	GO:0048667	biological_process	cell morphogenesis involved in neuron differentiation
-	-	-	GPR37L1	GO:0048712	biological_process	negative regulation of astrocyte differentiation
-	-	-	HDAC5	GO:0048742	biological_process	regulation of skeletal muscle fiber development
-	-	-	CACNB4	GO:0048747	biological_process	muscle cell development
KDR	-	-	-	GO:0048754	biological_process	branching morphogenesis of an epithelial tube
-	-	-	WWTR1	GO:0048762	biological_process	mesenchymal cell differentiation
SLC26A1	-	-	-	GO:0050427	biological_process	3'-phosphoadenosine 5'-phosphosulfate metabolic process
SLC26A1	-	-	-	GO:0050428	biological_process	3'-phosphoadenosine 5'-phosphosulfate biosynthetic process
-	-	-	RGCC	GO:0050710	biological_process	negative regulation of cytokine production
-	-	-	RGCC	GO:0050715	biological_process	positive regulation of cytokine production
RHOA	RHOA	RHOA	RHOA	GO:0050770	biological_process	regulation of axonogenesis
RHOA	RHOA	RHOA	RHOA	GO:0050771	biological_process	negative regulation of axonogenesis
RHOA	RHOA	RHOA	RHOA	GO:0050772	biological_process	positive regulation of axonogenesis
-	-	-	SLC1A3	GO:0050806	biological_process	positive regulation of synaptic transmission
-	-	-	CMKLR1	GO:0050848	biological_process	regulation of calcium-mediated signaling
-	-	-	CACNB4, PAG1	GO:0050852	biological_process	T cell receptor signaling pathway
-	-	-	PAG1	GO:0050863	biological_process	regulation of T cell activation
-	-	-	CTGF	GO:0050867	biological_process	positive regulation of cell activation
-	-	-	PAG1	GO:0050868	biological_process	negative regulation of T cell activation
-	-	-	SLC1A3	GO:0050885	biological_process	neuromuscular process controlling balance
OR4C15	-	-	OR1S2	GO:0050907	biological_process	detection of chemical stimulus involved in sensory perception
-	-	-	CACNB4	GO:0050908	biological_process	detection of light stimulus involved in visual perception
OR4C15	-	-	OR1S2	GO:0050911	biological_process	detection of chemical stimulus involved in sensory perception of smell
RHOA	RHOA	RHOA	RHOA	GO:0050919	biological_process	negative chemotaxis
KDR	-	-	-	GO:0050927	biological_process	positive regulation of positive chemotaxis
-	-	-	ATP2B4	GO:0051001	biological_process	negative regulation of nitric-oxide synthase activity
RHOA	RHOA, RHOB	RHOA	RHOA	GO:0051056	biological_process	regulation of small GTPase mediated signal transduction
-	-	-	HDAC5, RGCC	GO:0051091	biological_process	positive regulation of DNA-binding transcription factor activity
-	-	COL5A1	-	GO:0051128	biological_process	regulation of cellular component organization
-	KLF2	-	-	GO:0051247	biological_process	positive regulation of protein metabolic process
-	-	-	ADM, IL1RN	GO:0051384	biological_process	response to glucocorticoid
-	-	-	CTGF	GO:0051385	biological_process	response to mineralocorticoid
-	-	SLC4A4	-	GO:0051453	biological_process	regulation of intracellular pH
RHOA	RHOA	RHOA	CTGF, RGCC, RHOA	GO:0051496	biological_process	positive regulation of stress fiber assembly
-	-	-	ATP2B4	GO:0051599	biological_process	response to hydrostatic pressure
-	CDK15	CDK19	-	GO:0051726	biological_process	regulation of cell cycle
KDR	-	-	-	GO:0051770	biological_process	positive regulation of nitric-oxide synthase biosynthetic process
KDR	-	-	-	GO:0051894	biological_process	positive regulation of focal adhesion assembly
-	-	-	EPHA2	GO:0051898	biological_process	negative regulation of protein kinase B signaling
-	-	-	CACNB4	GO:0051899	biological_process	membrane depolarization
-	-	-	SLC1A3	GO:0051938	biological_process	L-glutamate import
-	-	-	TNNC1	GO:0055010	biological_process	ventricular cardiac muscle tissue morphogenesis
KDR	-	-	ATP2B4	GO:0055074	biological_process	calcium ion homeostasis
SLC26A1	-	SLC4A4, SLC36A1	ANO1, ATP2B4, GJB3, SLC1A3, SLC26A9, SLC2A14, SLC2A3, SLC6A20	GO:0055085	biological_process	transmembrane transport
CYP26C1	-	-	AIFM3, PXDN	GO:0055114	biological_process	obsolete oxidation-reduction process
-	-	-	EPHA2	GO:0060035	biological_process	notochord cell development
-	-	-	TNNC1	GO:0060048	biological_process	cardiac muscle contraction
-	-	-	SEMA3C	GO:0060174	biological_process	limb bud formation
-	-	MEIS1	-	GO:0060216	biological_process	definitive hemopoiesis
-	-	-	WWTR1	GO:0060271	biological_process	cilium assembly
-	-	-	PLK2	GO:0060291	biological_process	long-term synaptic potentiation
-	-	-	PLK2	GO:0060292	biological_process	long-term synaptic depression
-	-	-	CXCL1, DOCK4, EPHA2	GO:0060326	biological_process	cell chemotaxis
-	SP5	-	-	GO:0060349	biological_process	bone morphogenesis
-	-	-	WWTR1	GO:0060390	biological_process	regulation of SMAD protein signal transduction
-	-	-	CTGF	GO:0060401	biological_process	cytosolic calcium ion transport
-	-	-	CITED2	GO:0060412	biological_process	ventricular septum morphogenesis
-	-	-	CYR61	GO:0060413	biological_process	atrial septum morphogenesis
-	-	-	EPHA2	GO:0060444	biological_process	branching involved in mammary gland duct morphogenesis
-	-	-	CTGF	GO:0060452	biological_process	positive regulation of cardiac muscle contraction
-	KLF2	-	-	GO:0060509	biological_process	type I pneumocyte differentiation
-	-	-	CTGF, CYR61	GO:0060548	biological_process	negative regulation of cell death
-	-	-	CYR61	GO:0060591	biological_process	chondroblast differentiation
-	-	-	SEMA3C	GO:0060666	biological_process	dichotomous subdivision of terminal units involved in salivary gland branching
-	-	-	ADM	GO:0060670	biological_process	branching involved in labyrinthine layer morphogenesis
-	-	-	CYR61	GO:0060710	biological_process	chorio-allantoic fusion
-	-	-	ADM	GO:0060712	biological_process	spongiotrophoblast layer development
-	-	-	CYR61	GO:0060716	biological_process	labyrinthine layer blood vessel development
-	-	-	CITED2	GO:0060971	biological_process	embryonic heart tube left/right pattern formation
-	-	-	WWTR1	GO:0060993	biological_process	kidney morphogenesis
-	-	-	PLK2	GO:0061000	biological_process	negative regulation of dendritic spine development
-	-	-	CYR61	GO:0061036	biological_process	positive regulation of cartilage development
-	-	-	DOK7	GO:0061098	biological_process	positive regulation of protein tyrosine kinase activity
RHOA	RHOA	RHOA	RHOA	GO:0061383	biological_process	trabecula morphogenesis
-	-	-	CITED2	GO:0061428	biological_process	negative regulation of transcription from RNA polymerase II promoter in response to hypoxia
-	-	-	CMKLR1, CXCL1	GO:0070098	biological_process	chemokine-mediated signaling pathway
-	-	-	CTGF	GO:0070278	biological_process	extracellular matrix constituent secretion
-	KLF2, RHOB	-	-	GO:0070301	biological_process	cellular response to hydrogen peroxide
-	-	-	EPHA2	GO:0070309	biological_process	lens fiber cell morphogenesis
-	-	-	CTGF	GO:0070318	biological_process	positive regulation of G0 to G1 transition
-	-	-	CYR61, EPHA2	GO:0070372	biological_process	regulation of ERK1 and ERK2 cascade
-	-	-	PTPRR	GO:0070373	biological_process	negative regulation of ERK1 and ERK2 cascade
KDR	-	-	-	GO:0070374	biological_process	positive regulation of ERK1 and ERK2 cascade
-	-	-	MYL9	GO:0070527	biological_process	platelet aggregation
-	-	-	CTGF	GO:0070542	biological_process	response to fatty acid
-	-	-	IL1RN	GO:0070555	biological_process	response to interleukin-1
-	-	-	ATP2B4, CACNB4	GO:0070588	biological_process	calcium ion transmembrane transport
-	-	-	IL1RN	GO:0070670	biological_process	response to interleukin-4
-	-	-	SLC1A3	GO:0070779	biological_process	D-aspartate import across plasma membrane
CLDN18	-	-	-	GO:0070830	biological_process	bicellular tight junction assembly
-	-	-	EPHA2	GO:0070848	biological_process	response to growth factor
-	-	-	ATP2B4	GO:0070885	biological_process	negative regulation of calcineurin-NFAT signaling cascade
-	-	-	HDAC5	GO:0070932	biological_process	histone H3 deacetylation
-	-	-	HDAC5	GO:0070933	biological_process	histone H4 deacetylation
-	-	-	PPP1R15A	GO:0070972	biological_process	protein localization to endoplasmic reticulum
-	-	-	CITED2	GO:0070986	biological_process	left/right axis specification
-	-	-	RGCC	GO:0071158	biological_process	regulation of cell cycle
-	KLF2	-	-	GO:0071347	biological_process	cellular response to interleukin-1
-	KLF2	-	-	GO:0071356	biological_process	cellular response to tumor necrosis factor
-	KLF2	-	-	GO:0071409	biological_process	cellular response to cycloheximide
-	-	-	RGCC	GO:0071456	biological_process	cellular response to hypoxia
-	RHOB	-	-	GO:0071479	biological_process	cellular response to ionizing radiation
-	KLF2	-	-	GO:0071499	biological_process	cellular response to laminar fluid shear stress
-	-	-	KCNK9, KCNMB4	GO:0071805	biological_process	potassium ion transmembrane transport
-	-	-	RGCC	GO:0071850	biological_process	regulation of cell cycle
-	-	-	ATP2B4	GO:0071872	biological_process	cellular response to epinephrine stimulus
-	-	-	IL1RN	GO:0071874	biological_process	cellular response to norepinephrine stimulus
-	-	-	CTGF	GO:0071897	biological_process	DNA biosynthetic process
-	-	-	PTPRO	GO:0072112	biological_process	glomerular visceral epithelial cell differentiation
-	-	-	WWTR1	GO:0072307	biological_process	regulation of metanephric nephron tubule epithelial cell differentiation
-	-	-	RGCC	GO:0072537	biological_process	fibroblast activation
-	-	-	CPE	GO:0072657	biological_process	reactive oxygen species metabolic process
-	-	-	EPHA2	GO:0090004	biological_process	protein localization to membrane
-	-	-	HDAC5	GO:0090051	biological_process	negative regulation of cell migration involved in sprouting angiogenesis
-	-	-	PTPRO, WWTR1	GO:0090090	biological_process	negative regulation of canonical Wnt signaling pathway
-	-	-	KCNK9	GO:0090102	biological_process	cochlea development
-	-	TRIAP1	-	GO:0090201	biological_process	negative regulation of release of cytochrome c from mitochondria
-	-	-	PTPRO	GO:0090260	biological_process	negative regulation of retinal ganglion cell axon guidance
-	-	-	RGCC	GO:0090272	biological_process	negative regulation of fibroblast growth factor production
RHOA	RHOA	RHOA	RHOA	GO:0090307	biological_process	mitotic spindle assembly
-	-	TRIAP1	-	GO:0097035	biological_process	regulation of membrane lipid distribution
-	-	-	ADM	GO:0097084	biological_process	vascular associated smooth muscle cell development
-	-	-	AIFM3	GO:0097194	biological_process	execution phase of apoptosis
-	-	-	ATP2B4	GO:1900082	biological_process	negative regulation of arginine catabolic process
-	-	-	CITED2	GO:1900164	biological_process	nodal signaling pathway involved in determination of lateral mesoderm left/right asymmetry
-	-	-	CITED2	GO:2000020	biological_process	positive regulation of male gonad development
-	-	-	RGCC	GO:2000048	biological_process	negative regulation of cell-cell adhesion mediated by cadherin
-	-	-	LIMS2	GO:2000178	biological_process	negative regulation of neural precursor cell proliferation
-	-	-	CYR61	GO:2000304	biological_process	positive regulation of ceramide biosynthetic process
-	-	-	LIMS2	GO:2000346	biological_process	negative regulation of hepatocyte proliferation
KDR	-	-	-	GO:2000352	biological_process	negative regulation of endothelial cell apoptotic process
-	-	-	RGCC	GO:2000353	biological_process	positive regulation of endothelial cell apoptotic process
-	-	-	ATP2B4	GO:2000481	biological_process	positive regulation of cAMP-dependent protein kinase activity
-	-	-	RGCC	GO:2000573	biological_process	positive regulation of DNA biosynthetic process
-	-	-	IL1RN	GO:2000660	biological_process	negative regulation of interleukin-1-mediated signaling pathway
-	-	-	LIMS2	GO:2001046	biological_process	positive regulation of integrin-mediated signaling pathway
-	-	TRIAP1	-	GO:2001140	biological_process	positive regulation of phospholipid transport
KDR	-	-	ADM	GO:2001214	biological_process	positive regulation of vasculogenesis
-	-	-	SH3RF1	GO:2001237	biological_process	negative regulation of extrinsic apoptotic signaling pathway
-	-	-	HDAC5	GO:0000118	cellular_component	histone deacetylase complex
-	-	EGFR	CAV1, GALNT5, PDGFB, SCARA3	GO:0000139	cellular_component	Golgi membrane
-	-	-	PPP1R15A	GO:0000164	cellular_component	protein phosphatase type 1 complex
-	-	-	CITED2	GO:0000790	cellular_component	chromatin
STK31	-	-	TCTEX1D4	GO:0001669	cellular_component	acrosomal vesicle
-	-	-	MYL9	GO:0001725	cellular_component	stress fiber
-	-	-	ATP8B3, CAV1	GO:0002080	cellular_component	acrosomal membrane
-	-	-	CDRT1, GALNT5, KRTAP1-5, NCKAP5, S100A2	GO:0005575	cellular_component	cellular_component
KDR	-	COL5A1, IGFBP3	ADM, CTGF, CXCL1, EDN1, LAMA3, PDGFB, PNLIPRP2	GO:0005576	cellular_component	extracellular region
-	ZG16	-	CTGF, CYR61, PXDN	GO:0005578	cellular_component	extracellular matrix
-	-	-	SCARA3	GO:0005581	cellular_component	collagen trimer
-	-	COL5A1	-	GO:0005588	cellular_component	collagen type V trimer
-	-	COL5A1	LAMA3	GO:0005604	cellular_component	basement membrane
-	-	-	LAMA3	GO:0005606	cellular_component	laminin-1 complex
-	-	-	LAMA3	GO:0005610	cellular_component	laminin-5 complex
-	-	EGFR, IGFBP3	ADM, CTGF, CXCL1, EDN1, IL1RN, KRT34, PDGFB, PNLIPRP2, PTPRR, PTPRR, PXDN, SEMA3C, WFDC2	GO:0005615	cellular_component	extracellular space
-	-	-	CAV1, IL1RN, PLK2	GO:0005622	cellular_component	intracellular anatomical structure
KDR	FOXQ1, KLF2, RHOB, SP5	CSRNP3, EGFR, IGFBP3, MEIS1, SWAP70	ACSL6, AIFM3, CAMKK1, CITED2, CPE, CRYGC, HDAC5, LIMS2, LMO1, PTPN20B, RGCC, SLC2A14, SMPX, SPANXA1, TCTEX1D4, WWTR1	GO:0005634	cellular_component	nucleus
-	-	-	HDAC5, MAFF, TNNC1, WWTR1	GO:0005654	cellular_component	nucleoplasm
-	-	MEIS1	WWTR1	GO:0005667	cellular_component	transcription regulator complex
-	-	-	CERKL	GO:0005730	cellular_component	nucleolus
KRT28	-	EGFR, SWAP70	ADM, ANO1, CERKL, CITED2, CRYGC, EDN1, GJB3, GULP1, HDAC5, IL1RN, PDGFB, PPP1R15A, PTPN20B, RGCC, SPANXA1, SSUH2, TAGLN, WWTR1	GO:0005737	cellular_component	cytoplasm
-	-	TRIAP1	AIFM3, PPP1R15A, TNNC1	GO:0005739	cellular_component	mitochondrion
-	-	-	ACSL6, PPP1R15A	GO:0005741	cellular_component	mitochondrial outer membrane
-	-	-	AIFM3	GO:0005743	cellular_component	mitochondrial inner membrane
-	-	TRIAP1	-	GO:0005758	cellular_component	mitochondrial intermembrane space
-	-	SLC36A1	-	GO:0005765	cellular_component	lysosomal membrane
KDR	-	EGFR	CAV1	GO:0005768	cellular_component	endosome
KDR	RHOB	-	-	GO:0005769	cellular_component	early endosome
SZT2	-	-	-	GO:0005777	cellular_component	peroxisome
-	-	-	ACSL6	GO:0005778	cellular_component	peroxisomal membrane
KDR	-	SLC36A1	AIFM3, ATP8B3, CAV1, CERKL, PPP1R15A, PXDN	GO:0005783	cellular_component	endoplasmic reticulum
-	-	COL5A1	PDGFB	GO:0005788	cellular_component	endoplasmic reticulum lumen
CYP26C1	-	EGFR	ACSL6, PPP1R15A, SCARA3, SPTSSB	GO:0005789	cellular_component	endoplasmic reticulum membrane
KDR	-	-	ATP8B3, CERKL, CPE, CTGF, HDAC5, PPP1R15A, SH3RF1	GO:0005794	cellular_component	Golgi apparatus
-	ZG16	-	-	GO:0005796	cellular_component	Golgi lumen
-	-	-	CTGF	GO:0005801	cellular_component	cis-Golgi network
-	-	-	CAV1	GO:0005811	cellular_component	lipid droplet
-	-	-	PLK2, RGCC	GO:0005813	cellular_component	centrosome
-	-	-	PLK2	GO:0005814	cellular_component	centriole
-	-	-	PTPN20B, TCTEX1D4	GO:0005815	cellular_component	microtubule organizing center
RHOA	RHOA, RHOB	RHOA	AMOTL2, CACNB4, CAMKK1, CTGF, DOCK4, HDAC5, LIMS2, MYL9, PPP1R15A, RHOA, SH3RF1, TNNC1, WWTR1	GO:0005829	cellular_component	cytosol
-	-	-	GNGT2	GO:0005834	cellular_component	heterotrimeric G-protein complex
RHOA	RHOA	RHOA	RHOA	GO:0005856	cellular_component	cytoskeleton
-	-	-	MYL9	GO:0005859	cellular_component	muscle myosin complex
-	-	-	TNNC1	GO:0005861	cellular_component	troponin complex
-	-	-	PTPN20B	GO:0005874	cellular_component	microtubule
KRT28, KRT39	-	-	KRT34	GO:0005882	cellular_component	intermediate filament
CLDN18, KDR, LGSN, OR4C15, RHOA, SLC26A1	CYSLTR1, RHOA, RHOB	EGFR, RHOA, SLC36A1, SLC4A4, SWAP70, ZDHHC20	ACSL6, ACSL6, ANO1, ATP2B4, ATP8B3, CACNB4, CAV1, CMKLR1, CPE, CTGF, DOK7, EPHA2, GNGT2, GPR128, GPR37L1, GRPR, IL1RN, KCNK9, KCNMB4, LIMS2, OR1S2, PAG1, PTPRO, PTPRR, PTPRR, RHOA, SLC1A3, SLC26A9, SLC2A3, SLC6A20, TAS2R45	GO:0005886	cellular_component	plasma membrane
KDR, SLC26A1	CYSLTR1	OPN1SW, SLC4A4	ATP2B4, CAV1, CMKLR1, EPHA2, GRPR, KCNMB4, PTPRO, SLC6A20, TM4SF1, TM4SF1	GO:0005887	cellular_component	integral component of plasma membrane
-	-	-	CACNB4	GO:0005891	cellular_component	voltage-gated calcium channel complex
-	-	-	ATP2B4, CAV1	GO:0005901	cellular_component	caveola
-	-	-	GJB3	GO:0005921	cellular_component	gap junction
-	-	-	GJB3	GO:0005922	cellular_component	connexin complex
CLDN18	-	-	AMOTL2	GO:0005923	cellular_component	bicellular tight junction
RHOA	RHOA, RHOB	RHOA, EGFR	CAV1, EPHA2, LIMS2, RHOA	GO:0005925	cellular_component	focal adhesion
-	-	-	SMPX	GO:0005927	cellular_component	muscle tendon junction
-	-	-	CAV1	GO:0005929	cellular_component	cilium
-	-	-	TCTEX1D4	GO:0005930	cellular_component	axoneme
RHOA	RHOA	RHOA	CAV1, CTGF, RHOA	GO:0005938	cellular_component	cell cortex
-	-	-	KCNK9	GO:0008021	cellular_component	synaptic vesicle
-	-	-	KCNMB4	GO:0008076	cellular_component	voltage-gated potassium channel complex
KDR	-	-	ANO1	GO:0009897	cellular_component	external side of plasma membrane
-	-	-	CACNB4	GO:0009898	cellular_component	cytoplasmic side of plasma membrane
-	-	EGFR	EPHA2, PDGFB, SLC1A3, SLC26A9	GO:0009986	cellular_component	cell surface
-	RHOB	EGFR	-	GO:0010008	cellular_component	endosome membrane
-	-	-	DOCK4	GO:0012505	cellular_component	endomembrane system
-	-	-	SH2D5	GO:0014069	cellular_component	postsynaptic density
-	-	-	TNNC1	GO:0015629	cellular_component	actin cytoskeleton
-	-	SLC36A1	-	GO:0015992	cellular_component	membrane
-	CYSLTR1	EGFR, ZDHHC20	ACSL6, ACSL6, ATP2B4, DOCK4, PPP1R15A, SEMA3C, SLC1A3	GO:0016020	cellular_component	membrane
CLDN18, CYP26C1, OR4C15, SLC26A1, SMIM24	MXRA7	EGFR, SLC36A1, ZDHHC20	ACSL6, ATP8B3, CMKLR1, GALNT5, GJB3, GPR128, GPR37L1, KCNK9, OR1S2, PAG1, PTPRO, PTPRR, PTPRR, SCARA3, SLC1A3, SLC26A9, SLC2A14, SLC2A3, SPTSSB, TAS2R45, TMCC3, WBSCR28	GO:0016021	cellular_component	integral component of membrane
KDR	-	-	ARL14	GO:0016023	cellular_component	cytoplasmic vesicle
-	-	EGFR, SLC4A4	CAV1, PDGFB	GO:0016323	cellular_component	basolateral plasma membrane
-	-	EGFR	AMOTL2, ANO1, CAV1, PTPRO, SLC26A9, SLC6A20	GO:0016324	cellular_component	apical plasma membrane
-	-	-	PTPRO	GO:0016328	cellular_component	lateral plasma membrane
-	-	-	HDAC5	GO:0016604	cellular_component	nuclear body
-	-	IGFBP3	-	GO:0016942	cellular_component	insulin-like growth factor binding protein complex
-	-	-	SPTSSB	GO:0017059	cellular_component	serine C-palmitoyltransferase complex
-	-	-	ATP2B4, MYL9	GO:0030018	cellular_component	Z disc
RHOA	RHOA	RHOA, SWAP70	PTPRO, RHOA, SH3RF1	GO:0030027	cellular_component	lamellipodium
KDR, RHOA	RHOA	RHOA	DOK7, RHOA, SH2D5	GO:0030054	cellular_component	cell junction
-	-	EGFR	-	GO:0030122	cellular_component	AP-2 adaptor complex
-	-	-	ATP2B4	GO:0030315	cellular_component	T-tubule
-	-	-	PTPRO	GO:0030424	cellular_component	axon
-	-	-	PLK2	GO:0030425	cellular_component	dendrite
-	-	-	PTPRO	GO:0030426	cellular_component	growth cone
RHOA	RHOA	RHOA	RHOA	GO:0030496	cellular_component	midbody
-	-	-	CPE	GO:0030658	cellular_component	transport vesicle membrane
-	-	-	SNX22	GO:0030659	cellular_component	cytoplasmic vesicle membrane
-	-	-	CAV1	GO:0030666	cellular_component	endocytic vesicle membrane
-	-	-	CPE	GO:0030667	cellular_component	secretory granule membrane
-	ZG16	COL5A1	CYR61, PXDN	GO:0031012	cellular_component	extracellular matrix
-	-	-	PDGFB	GO:0031093	cellular_component	platelet alpha granule lumen
-	-	-	EPHA2	GO:0031256	cellular_component	leading edge membrane
-	-	-	EPHA2	GO:0031258	cellular_component	lamellipodium membrane
-	-	-	AMOTL2, CAV1	GO:0031410	cellular_component	cytoplasmic vesicle
-	-	-	SMPX	GO:0031430	cellular_component	M band
-	-	-	DOK7	GO:0031594	cellular_component	neuromuscular junction
-	-	-	CAV1	GO:0031901	cellular_component	early endosome membrane
-	RHOB	-	-	GO:0031902	cellular_component	late endosome membrane
-	-	EGFR	-	GO:0031965	cellular_component	nuclear membrane
RHOA	RHOA, RHOB	RHOA	RHOA	GO:0032154	cellular_component	cleavage furrow
-	-	-	DOCK4	GO:0032420	cellular_component	stereocilium
-	-	-	DOCK4	GO:0032421	cellular_component	stereocilium bundle
-	-	-	EPHA2	GO:0032587	cellular_component	ruffle membrane
-	-	-	EDN1	GO:0033093	cellular_component	Weibel-Palade body
-	-	-	ANO1	GO:0034707	cellular_component	chloride channel complex
-	-	-	TCTEX1D4	GO:0036126	cellular_component	sperm flagellum
-	ZG16	-	-	GO:0042589	cellular_component	zymogen granule membrane
-	-	OPN1SW	-	GO:0042622	cellular_component	photoreceptor outer segment membrane
-	-	-	SLC1A3	GO:0042995	cellular_component	cell projection
-	-	-	PTPRO	GO:0043005	cellular_component	neuron projection
-	-	-	SLC1A3	GO:0043025	cellular_component	neuronal cell body
-	-	-	SMPX	GO:0043034	cellular_component	costamere
-	-	-	PTPRO	GO:0043197	cellular_component	dendritic spine
-	-	-	SLC1A3	GO:0043205	cellular_component	supramolecular fiber
-	-	-	CTGF	GO:0043231	cellular_component	intracellular membrane-bounded organelle
-	-	-	ATP2B4, CAV1	GO:0043234	cellular_component	protein-containing complex
-	-	-	GPR37L1	GO:0043235	cellular_component	receptor complex
RHOA	RHOA	RHOA	RHOA	GO:0043296	cellular_component	apical junction complex
-	-	COL5A1	KRTAP1-5, KRTAP3-1	GO:0045095	cellular_component	keratin filament
KDR	-	-	CAV1, PAG1	GO:0045121	cellular_component	membrane raft
-	-	-	CACNB4	GO:0045202	cellular_component	synapse
-	-	-	SH2D5	GO:0045211	cellular_component	postsynaptic membrane
-	-	TRIAP1	-	GO:0048471	cellular_component	perinuclear region of cytoplasm
-	-	-	AMOTL2	GO:0055037	cellular_component	recycling endosome
-	ZG16	-	-	GO:0060205	cellular_component	cytoplasmic vesicle lumen
KRT28, RHOA, SMIM24, SZT2	RHOA, RHOB	COL5A1, IGFBP3, PABPC1L2B, RHOA, SLC4A4	ANO1, CPE, IL1RN, KRT34, LAMA3, PTPRO, PXDN, RHOA, SEMA3C, SLC26A9, SLC2A3, WFDC2	GO:0070062	cellular_component	extracellular exosome
-	-	PABPC1L2B	-	GO:0000166	molecular_function	nucleotide binding
-	-	-	ATP8B3	GO:0000287	molecular_function	magnesium ion binding
-	-	MEIS1	-	GO:0000978	molecular_function	RNA polymerase II cis-regulatory region sequence-specific DNA binding
-	FOXQ1	-	-	GO:0000981	molecular_function	DNA-binding transcription factor activity, RNA polymerase II-specific
-	-	-	HDAC5	GO:0001047	molecular_function	core promoter sequence-specific DNA binding
-	-	MEIS1	-	GO:0001077	molecular_function	DNA-binding transcription activator activity, RNA polymerase II-specific
-	-	-	CITED2	GO:0001106	molecular_function	transcription corepressor activity
-	-	CSRNP3	-	GO:0001228	molecular_function	DNA-binding transcription activator activity, RNA polymerase II-specific
-	-	EGFR	-	GO:0001948	molecular_function	protein amino acid binding, glycoprotein binding
-	-	IGFBP3	CTGF	GO:0001968	molecular_function	fibronectin binding
CYP26C1	-	-	-	GO:0001972	molecular_function	retinoic acid binding
-	-	TRIAP1	-	GO:0002039	molecular_function	p53 binding
KRT28, SMIM24, SZT2	-	-	CDRT1, KRTAP1-5, TM4SF1, TM4SF1	GO:0003674	molecular_function	molecular_function
-	-	SWAP70	-	GO:0003677	molecular_function	DNA binding
-	-	EGFR, MEIS1	CITED2	GO:0003682	molecular_function	chromatin binding
-	-	EGFR	-	GO:0003690	molecular_function	double-stranded DNA binding
-	KLF2	CSRNP3	CITED2, MAFF	GO:0003700	molecular_function	DNA-binding transcription factor activity
-	-	MEIS1	-	GO:0003705	molecular_function	DNA-binding transcription factor activity, RNA polymerase II-specific
-	-	-	CITED2, WWTR1	GO:0003713	molecular_function	transcription coactivator activity
-	-	-	CITED2, HDAC5, WWTR1	GO:0003714	molecular_function	transcription corepressor activity
-	-	PABPC1L2B	-	GO:0003723	molecular_function	RNA binding
-	-	-	LIMCH1	GO:0003779	molecular_function	actin binding
RHOA	RHOA, RHOB	RHOA	GNGT2, RHOA	GO:0003924	molecular_function	GTPase activity
-	-	-	CERKL	GO:0003951	molecular_function	NAD+ kinase activity
-	-	-	ATP8B3	GO:0004012	molecular_function	ATPase-coupled intramembrane lipid transporter activity
-	-	-	CERKL	GO:0004143	molecular_function	diacylglycerol kinase activity
-	-	-	CPE	GO:0004180	molecular_function	carboxypeptidase activity
-	-	-	CPE	GO:0004181	molecular_function	metallocarboxypeptidase activity
LGSN	-	-	-	GO:0004356	molecular_function	glutamate-ammonia ligase activity
-	-	-	HDAC5	GO:0004407	molecular_function	histone deacetylase activity
-	-	-	ACSL6	GO:0004467	molecular_function	long-chain fatty acid-CoA ligase activity
-	-	-	PXDN	GO:0004601	molecular_function	peroxidase activity
-	-	-	PNLIPRP2	GO:0004620	molecular_function	phospholipase activity
-	-	-	GALNT5	GO:0004653	molecular_function	polypeptide N-acetylgalactosaminyltransferase activity
STK31	-	-	PLK2	GO:0004674	molecular_function	protein serine/threonine kinase activity
-	-	-	CAMKK1	GO:0004683	molecular_function	calmodulin-dependent protein kinase activity
-	CDK15	CDK19	-	GO:0004693	molecular_function	cyclin-dependent protein serine/threonine kinase activity
-	-	EGFR	-	GO:0004709	molecular_function	MAP kinase kinase kinase activity
KDR	-	EGFR	-	GO:0004713	molecular_function	protein tyrosine kinase activity
KDR	-	EGFR	EPHA2	GO:0004714	molecular_function	transmembrane receptor protein tyrosine kinase activity
KDR	-	EGFR	-	GO:0004716	molecular_function	obsolete signal transducer, downstream of receptor, with protein tyrosine kinase activity
-	-	-	PTPN20B, PTPRO, PTPRR	GO:0004725	molecular_function	protein tyrosine phosphatase activity
-	-	-	SPTSSB	GO:0004758	molecular_function	serine C-palmitoyltransferase activity
-	-	-	PNLIPRP2	GO:0004806	molecular_function	triglyceride lipase activity
-	-	-	WFDC2	GO:0004866	molecular_function	endopeptidase inhibitor activity
-	-	-	WFDC2	GO:0004867	molecular_function	serine-type endopeptidase inhibitor activity
-	-	-	WFDC2	GO:0004869	molecular_function	cysteine-type endopeptidase inhibitor activity
-	-	-	GNGT2, GULP1	GO:0004871	molecular_function	obsolete signal transducer activity
-	-	OPN1SW	CMKLR1, SEMA3C	GO:0004872	molecular_function	signaling receptor activity
OR4C15	-	EGFR	OR1S2	GO:0004888	molecular_function	transmembrane signaling receptor activity
OR4C15	-	OPN1SW	OR1S2, CMKLR1, GPR128	GO:0004930	molecular_function	G protein-coupled receptor activity
-	-	-	GRPR	GO:0004946	molecular_function	bombesin receptor activity
-	-	-	CMKLR1	GO:0004950	molecular_function	chemokine receptor activity
-	CYSLTR1	-	-	GO:0004974	molecular_function	leukotriene receptor activity
OR4C15	-	-	OR1S2	GO:0004984	molecular_function	olfactory receptor activity
-	-	-	PTPRO, PTPRR	GO:0005001	molecular_function	transmembrane receptor protein tyrosine phosphatase activity
-	-	-	EPHA2	GO:0005003	molecular_function	ephrin receptor activity
-	-	EGFR	-	GO:0005006	molecular_function	epidermal growth factor-activated receptor activity
KDR	-	-	-	GO:0005021	molecular_function	vascular endothelial growth factor-activated receptor activity
-	-	-	SCARA3	GO:0005044	molecular_function	scavenger receptor activity
-	-	-	PAG1	GO:0005070	molecular_function	obsolete SH3/SH2 adaptor activity
-	-	-	HDAC5	GO:0005080	molecular_function	protein kinase C binding
-	-	-	DOCK4	GO:0005085	molecular_function	guanyl-nucleotide exchange factor activity
-	-	-	ADM, CAV1, CXCL1, LAMA3	GO:0005102	molecular_function	signaling receptor binding
-	-	-	CAV1	GO:0005113	molecular_function	patched binding
-	-	-	EDN1, IL1RN	GO:0005125	molecular_function	cytokine activity
-	-	-	IL1RN	GO:0005149	molecular_function	interleukin-1 receptor binding
-	-	-	IL1RN	GO:0005150	molecular_function	interleukin-1, type I receptor binding
-	-	-	IL1RN	GO:0005151	molecular_function	interleukin-1, type II receptor binding
-	-	-	IL1RN, PXDN	GO:0005152	molecular_function	interleukin-1 receptor antagonist activity
-	-	-	DOK7	GO:0005158	molecular_function	insulin receptor binding
-	-	-	PDGFB	GO:0005161	molecular_function	platelet-derived growth factor receptor binding
KDR	-	COL5A1, EGFR	CTGF, CYR61	GO:0005178	molecular_function	integrin binding
-	-	-	ADM, EDN1	GO:0005179	molecular_function	hormone activity
CLDN18, KRT28, KRT39	-	-	CAV1, KRT34, KRTAP3-1, KRTAP3-1, LAMA3	GO:0005198	molecular_function	structural molecule activity
-	-	COL5A1	PXDN	GO:0005201	molecular_function	extracellular matrix structural constituent
-	-	-	CRYGC	GO:0005212	molecular_function	structural constituent of eye lens
-	-	-	ANO1	GO:0005227	molecular_function	calcium activated cation channel activity
-	-	-	ANO1	GO:0005229	molecular_function	intracellular calcium activated chloride channel activity
-	-	-	GJB3	GO:0005243	molecular_function	gap junction channel activity
-	-	-	KCNK9	GO:0005244	molecular_function	voltage-gated ion channel activity
-	-	-	CACNB4	GO:0005245	molecular_function	voltage-gated calcium channel activity
-	-	-	SLC26A9	GO:0005254	molecular_function	chloride channel activity
-	-	-	KCNK9	GO:0005267	molecular_function	potassium channel activity
-	-	SLC36A1	-	GO:0005280	molecular_function	amino acid:proton symporter activity
-	-	-	SLC1A3	GO:0005313	molecular_function	L-glutamate transmembrane transporter activity
-	-	-	SLC1A3	GO:0005314	molecular_function	high-affinity glutamate transmembrane transporter activity
-	-	-	SLC6A20	GO:0005328	molecular_function	neurotransmitter:sodium symporter activity
-	-	-	SLC2A3, SLC2A14	GO:0005355	molecular_function	glucose transmembrane transporter activity
-	-	-	ATP2B4	GO:0005388	molecular_function	P-type calcium transporter activity
-	-	SLC4A4	-	GO:0005452	molecular_function	inorganic anion exchanger activity
CYP26C1	-	-	-	GO:0005506	molecular_function	iron ion binding
-	-	SWAP70	-	GO:0005509	molecular_function	calcium ion binding
KDR, RHOA	CDK15, CYSLTR1, KLF2, RHOA, RHOB	EGFR, IGFBP3, MEIS1, RHOA, SLC4A4, TRIAP1	ADM, AMOTL2, ANO1, ARL14, ATP2B4, CACNB4, CAMKK1, CAV1, CITED2, CMKLR1, CRYGC, CTGF, DOCK4, EDN1, EPHA2, GPR37L1, HDAC5, KCNMB4, PAG1, PDGFB, PLK2, PPP1R15A, PTPRO, PTPRR, PTPRR, RGCC, RHOA, S100A2, SH3RF1, SPTSSB, TAGLN, TAGLN, TCTEX1D4, TNNC1, WWTR1	GO:0005515	molecular_function	protein binding
-	-	-	ATP2B4, CAMKK1	GO:0005516	molecular_function	calmodulin binding
-	-	-	PDGFB	GO:0005518	molecular_function	collagen binding
-	-	IGFBP3	CTGF, CYR61	GO:0005520	molecular_function	insulin-like growth factor binding
KDR, STK31	CDK15	CDK19, EGFR, SWAP70	ACSL6, ATP2B4, ATP8B3, CAMKK1, EPHA2, PLK2	GO:0005524	molecular_function	ATP binding
RHOA	RHOA, RHOB	RHOA	ARL14, RHOA	GO:0005525	molecular_function	GTP binding
-	-	-	CXCL1	GO:0008009	molecular_function	chemokine activity
-	-	-	CXCL1	GO:0008047	molecular_function	enzyme activator activity
-	-	-	CTGF, CXCL1, PDGFB	GO:0008083	molecular_function	growth factor activity
-	-	-	HDAC5	GO:0008134	molecular_function	transcription factor binding
-	-	-	PPP1R15A	GO:0008157	molecular_function	protein phosphatase 1 binding
-	-	IGFBP3	-	GO:0008160	molecular_function	protein tyrosine phosphatase activator activity
-	METTL6	-	-	GO:0008168	molecular_function	methyltransferase activity
-	-	COL5A1	CTGF, CYR61	GO:0008201	molecular_function	heparin binding
-	-	-	NT5DC4	GO:0008253	molecular_function	5'-nucleotidase activity
-	-	ZDHHC20	LIMS2, LIMCH1, CPE, SH3RF1, LMO1	GO:0008270	molecular_function	zinc ion binding
SLC26A1	-	-	SLC26A9	GO:0008271	molecular_function	secondary active sulfate transmembrane transporter activity
-	-	-	MYL9	GO:0008307	molecular_function	structural constituent of muscle
-	RHOB	-	CACNB4	GO:0008331	molecular_function	high voltage-gated calcium channel activity
CYP26C1	-	-	-	GO:0008401	molecular_function	retinoic acid 4-hydroxylase activity
-	-	SLC4A4	-	GO:0008510	molecular_function	sodium:bicarbonate symporter activity
-	-	-	GPR37L1, GRPR	GO:0008528	molecular_function	G protein-coupled peptide receptor activity
-	-	-	PPP1R15A	GO:0008599	molecular_function	protein phosphatase regulator activity
-	-	OPN1SW	-	GO:0009881	molecular_function	photoreceptor activity
-	-	SLC36A1	-	GO:0015078	molecular_function	proton transmembrane transporter activity
-	-	-	SLC26A9	GO:0015106	molecular_function	bicarbonate transmembrane transporter activity
SLC26A1	-	-	-	GO:0015108	molecular_function	chloride transmembrane transporter activity
SLC26A1	-	-	-	GO:0015116	molecular_function	sulfate transmembrane transporter activity
-	-	-	SLC6A20	GO:0015171	molecular_function	amino acid transmembrane transporter activity
-	-	SLC36A1	-	GO:0015180	molecular_function	L-alanine transmembrane transporter activity
-	-	SLC36A1	-	GO:0015187	molecular_function	glycine transmembrane transporter activity
-	-	SLC36A1	-	GO:0015193	molecular_function	L-proline transmembrane transporter activity
-	-	-	KCNMB4	GO:0015269	molecular_function	calcium-activated potassium channel activity
SLC26A1	-	-	SLC26A9	GO:0015301	molecular_function	anion:anion antiporter activity
-	-	-	KCNMB4	GO:0015459	molecular_function	potassium channel regulator activity
-	-	-	CAV1	GO:0015485	molecular_function	cholesterol binding
-	-	-	PDGFB	GO:0016176	molecular_function	superoxide-generating NADPH oxidase activator activity
-	-	ZDHHC20	-	GO:0016409	molecular_function	palmitoyltransferase activity
-	-	-	AIFM3	GO:0016491	molecular_function	oxidoreductase activity
-	-	-	CAV1	GO:0016504	molecular_function	peptidase activator activity
-	-	-	SLC1A3	GO:0016595	molecular_function	glutamate binding
-	-	-	PTPRO	GO:0016791	molecular_function	phosphatase activity
-	-	-	SH3RF1	GO:0016874	molecular_function	ligase activity
RHOA	RHOA	RHOA	RHOA	GO:0017022	molecular_function	myosin binding
-	-	-	ATP2B4	GO:0017080	molecular_function	sodium channel regulator activity
-	-	-	DOCK4	GO:0017124	molecular_function	SH3 domain binding
-	-	-	PTPRO	GO:0017147	molecular_function	Wnt-protein binding
-	-	-	SLC1A3	GO:0017153	molecular_function	sodium:dicarboxylate symporter activity
-	RHOB	-	-	GO:0019003	molecular_function	GDP binding
SLC26A1	-	-	-	GO:0019531	molecular_function	oxalate transmembrane transporter activity
-	-	ZDHHC20	-	GO:0019706	molecular_function	protein-cysteine S-palmitoyltransferase activity
-	-	-	WFDC2	GO:0019828	molecular_function	aspartic-type endopeptidase inhibitor activity
KDR	-	-	-	GO:0019838	molecular_function	growth factor binding
-	-	EGFR	ACSL6, CAV1	GO:0019899	molecular_function	enzyme binding
-	-	EGFR	CAV1, PTPRR, PPP1R15A, RGCC, DOK7, CACNB4	GO:0019901	molecular_function	protein kinase binding
-	-	EGFR	-	GO:0019903	molecular_function	protein phosphatase binding
CYP26C1	-	-	PXDN	GO:0020037	molecular_function	heme binding
-	-	-	DOCK4	GO:0030165	molecular_function	PDZ domain binding
-	-	-	SEMA3C	GO:0030215	molecular_function	semaphorin receptor binding
-	-	EGFR	-	GO:0030235	molecular_function	nitric-oxide synthase regulator activity
-	ZG16	-	GALNT5	GO:0030246	molecular_function	carbohydrate binding
-	-	-	RGCC	GO:0030295	molecular_function	protein kinase activator activity
-	-	-	ATP2B4	GO:0030346	molecular_function	protein phosphatase 2B binding
-	-	-	DOCK4	GO:0030675	molecular_function	GTPase activator activity
-	-	-	DOCK4	GO:0030971	molecular_function	receptor tyrosine kinase binding
-	-	-	TNNC1	GO:0031013	molecular_function	troponin I binding
-	-	-	TNNC1	GO:0031014	molecular_function	troponin T binding
-	-	EGFR	-	GO:0031625	molecular_function	ubiquitin protein ligase binding
-	-	-	ADM	GO:0031700	molecular_function	adrenomedullin receptor binding
-	-	-	EDN1	GO:0031707	molecular_function	endothelin A receptor binding
-	-	-	EDN1	GO:0031708	molecular_function	endothelin B receptor binding
-	-	IGFBP3	-	GO:0031994	molecular_function	insulin-like growth factor I binding
-	-	IGFBP3	-	GO:0031995	molecular_function	insulin-like growth factor II binding
-	-	-	HDAC5	GO:0032041	molecular_function	NAD-dependent histone deacetylase activity (H3-K14 specific)
-	-	-	PLK2	GO:0032403	molecular_function	protein-containing complex binding
-	-	-	CAV1	GO:0032947	molecular_function	molecular adaptor activity
-	-	-	TAS2R45	GO:0033038	molecular_function	bitter taste receptor activity
-	-	-	CITED2	GO:0035035	molecular_function	histone acetyltransferase binding
-	-	-	DOK7, SNX22	GO:0035091	molecular_function	phosphatidylinositol binding
KDR	-	-	-	GO:0038085	molecular_function	vascular endothelial growth factor binding
-	-	-	CPE	GO:0042043	molecular_function	neurexin family protein binding
-	-	-	PDGFB	GO:0042056	molecular_function	chemoattractant activity
-	-	-	PAG1	GO:0042169	molecular_function	SH2 domain binding
-	-	-	GPR37L1	GO:0042277	molecular_function	peptide binding
CLDN18	-	EGFR	AMOTL2, CAV1, PDGFB, S100A2	GO:0042802	molecular_function	identical protein binding
-	-	-	ACSL6, ANO1, KCNK9, PDGFB, PTPRO, TNNC1, WWTR1	GO:0042803	molecular_function	protein homodimerization activity
-	-	COL5A1	-	GO:0043394	molecular_function	proteoglycan binding
-	FOXQ1, KLF2, SP5	CSRNP3	MAFF	GO:0043565	molecular_function	sequence-specific DNA binding
-	-	-	HDAC5	GO:0044212	molecular_function	transcription cis-regulatory region binding
-	-	-	CAV1	GO:0044325	molecular_function	transmembrane transporter binding
-	-	-	CXCL1	GO:0045236	molecular_function	CXCR chemokine receptor binding
-	-	-	IL1RN	GO:0045352	molecular_function	interleukin-1 type I receptor antagonist activity
-	-	-	IL1RN	GO:0045353	molecular_function	interleukin-1 type II receptor antagonist activity
-	CDK15, KLF2, SP5	COL5A1, IGFBP3	AIFM3, ATP2B4, GALNT5, HDAC5, NT5DC4, PXDN	GO:0046872	molecular_function	metal ion binding
-	-	-	HDAC5	GO:0046969	molecular_function	NAD-dependent histone deacetylase activity (H3-K9 specific)
-	-	-	HDAC5	GO:0046970	molecular_function	NAD-dependent histone deacetylase activity (H4-K16 specific)
-	-	MEIS1	ANO1, KCNK9	GO:0046982	molecular_function	protein heterodimerization activity
-	-	-	PNLIPRP2	GO:0047372	molecular_function	acylglycerol lipase activity
-	-	-	PNLIPRP2	GO:0047714	molecular_function	galactolipase activity
-	-	-	TNNC1	GO:0048306	molecular_function	calcium-dependent protein binding
-	-	-	DOCK4	GO:0048365	molecular_function	small GTPase binding
-	-	COL5A1	-	GO:0048407	molecular_function	platelet-derived growth factor binding
-	-	-	AIFM3	GO:0050660	molecular_function	flavin adenine dinucleotide binding
-	-	-	CITED2	GO:0050693	molecular_function	LBD domain binding
-	-	-	CPE	GO:0050839	molecular_function	cell adhesion molecule binding
-	-	-	CYR61	GO:0050840	molecular_function	extracellular matrix binding
-	-	-	ATP2B4	GO:0050998	molecular_function	nitric-oxide synthase binding
-	-	-	TAGLN, TNNC1	GO:0051015	molecular_function	actin filament binding
-	-	-	SLC26A9	GO:0051117	molecular_function	ATPase binding
-	-	-	AIFM3	GO:0051537	molecular_function	2 iron, 2 sulfur cluster binding
KDR	-	-	-	GO:0051879	molecular_function	Hsp90 protein binding
-	-	-	RGCC	GO:0070412	molecular_function	R-SMAD binding
-	-	-	HDAC5	GO:0070491	molecular_function	DNA-binding transcription factor binding
-	-	-	PPP1R15A	GO:0071862	molecular_function	protein phosphatase activator activity
-	-	-	CTGF, CYR61	GO:0072593	molecular_function	protein phosphatase activator activity
-	-	-	ATP2B4	GO:0097110	molecular_function	scaffold protein binding
